# Supplementary material for: Adherence to guidelines in the use of biological agents to treat psoriasis in Brazil
Source: PubMed Central journal article supplement — BMJ Open. 2014 Mar 4;4(3):e004179. doi: 10.1136/bmjopen-2013-004179 (PMC3948458; doi:10.1136/bmjopen-2013-004179), 2014-03-04
Supplement: bmjopen-2013-004179.draft_revisions.pdf [file bmjopen-2013-004179.draft_revisions.pdf]

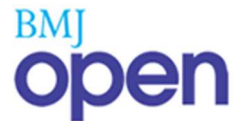

## Adherence to guidelines in use of biological agents to treat psoriasis in Brazil

|                                                                                                                                                                                    |                                                                                                                                                                                                                                                                                                                                                                                                              |
|------------------------------------------------------------------------------------------------------------------------------------------------------------------------------------|--------------------------------------------------------------------------------------------------------------------------------------------------------------------------------------------------------------------------------------------------------------------------------------------------------------------------------------------------------------------------------------------------------------|
| Journal:                                                                                                                                                                           | <i>BMJ Open</i>                                                                                                                                                                                                                                                                                                                                                                                              |
| Manuscript ID:                                                                                                                                                                     | bmjopen-2013-004179                                                                                                                                                                                                                                                                                                                                                                                          |
| Article Type:                                                                                                                                                                      | Research                                                                                                                                                                                                                                                                                                                                                                                                     |
| Date Submitted by the Author:                                                                                                                                                      | 05-Oct-2013                                                                                                                                                                                                                                                                                                                                                                                                  |
| Complete List of Authors:                                                                                                                                                          | Silveira, Miriam; UNISO, Pharmaceutical Science de Camargo, Iara; UNISO, Pharmaceutical Science Osorio-de-Castro, Claudia; FIOCRUZ, ENSP - Núcleo de Assistência Farmacêutica Barberato-Filho, Silvio; UNISO, Pharmaceutical Science Del Fiol, Fernando; UNISO, Pharmaceutical Science Guyatt, Gordon; McMaster University, Clinical Epidemiology and Biostatistics Lopes, Luciane; UNISO, Pharmacie Science |
| <b>Primary Subject Heading</b>:                                                                                                                                                    | Public health                                                                                                                                                                                                                                                                                                                                                                                                |
| Secondary Subject Heading:                                                                                                                                                         | Evidence based practice, Dermatology, Medical education and training                                                                                                                                                                                                                                                                                                                                         |
| Keywords:                                                                                                                                                                          | CLINICAL PHARMACOLOGY, Psoriasis < DERMATOLOGY, Health policy < HEALTH SERVICES ADMINISTRATION & MANAGEMENT, Protocols & guidelines < HEALTH SERVICES ADMINISTRATION & MANAGEMENT                                                                                                                                                                                                                            |
| <p>Note: The following files were submitted by the author for peer review, but cannot be converted to PDF. You must view these files (e.g. movies) online.</p> <p>Figure 1.emf</p> |                                                                                                                                                                                                                                                                                                                                                                                                              |

**TITLE: Adherence to guidelines in use of biological agents to treat psoriasis in Brazil**

**AUTHORS**

**Miriam Sanches do Nascimento Silveira, MSc**

*Pharmaceutical Sciences Post graduate Course, University of Sorocaba, UNISO, Brazil.*  
miriam.silveira@prof.uniso.br

**Iara Alves de Camargo MSc**

*Pharmaceutical Sciences Post graduate Course, University of Sorocaba, UNISO, Brazil. Codes -  
Secretaria Estadual de Saúde – São Paulo*  
iadec@uol.com.br

**Claudia Garcia Serpa Osorio-de-Castro, PhD**

*Núcleo de Assistência Farmacêutica, Escola Nacional de Saúde Pública Sérgio Arouca - Fundação  
Oswaldo Cruz – Fiocruz*  
claudia.osorio@ensp.fiocruz.br

**Silvio Barberato-Filho, PhD**

Programa de Pós-Graduação em Ciências Farmacêuticas da Universidade de Sorocaba, SP  
[silvio.barberato@prof.uniso.br](mailto:silvio.barberato@prof.uniso.br)

**Fernando de Sá Del Fiol, PhD**

Programa de Pós-Graduação em Ciências Farmacêuticas da Universidade de Sorocaba, SP  
[fernando.fiol@prof.uniso.br](mailto:fernando.fiol@prof.uniso.br)

**Gordon Guyatt MD, MSc**

*Department of Clinical Epidemiology and Biostatistics, McMaster University, Canada.*  
guyatt@mcmaster.ca

**Luciane Cruz Lopes, PhD**

*Pharmaceutical Sciences Post graduate Course, University of Sorocaba, UNISO, Brazil.*  
luslopes@terra.com.br

**Contact information for the corresponding author:** Luciane Cruz Lopes,

luslopes@terra.com.br

- ✓ **Financial support:** FAPESP – Fundação de Amparo a Pesquisa - Process N. 2009/53084-1
- ✓ **No conflict of interest**
- ✓ **Word count: 2284**
- ✓ **Protocol approved ethics committee: 11/2009**
- ✓ **There are no additional data available**
- ✓ **Key words:** psoriasis, biological, guidelines, health public, policy, Brazil.

1  
2  
3 [BACKGROUND]: In São Paulo, Brazil, patients gain funding for biological agents for  
4 treatment of psoriasis through lawsuits to the government. The extent to which  
5 management of such patients adhere to authoritative guidelines is uncertain.  
6  
7

8 [OBJECTIVE]: To determine the extent to which clinical practice adheres to authoritative  
9 guidelines in patients receiving treatment for psoriasis through lawsuits.  
10  
11

12 [METHODS]: We identified patients through records of the State Health Secretariat of  
13 São Paulo from 2004 to 2011. We consulted guidelines from five countries and chose as  
14 standards only those recommendations that the guidelines uniformly endorsed. Pharmacy  
15 records provided data regarding biologic use. Guidelines recommended biologics agents  
16 only in patients with severe psoriasis who have failed to respond to both topical and  
17 systemic therapies (e.g. cyclosporine and methotrexate) and recommended yearly  
18 monitoring of blood counts and liver function.  
19  
20  
21  
22  
23

24 [RESULTS]: Of 218 patients identified in the database, 3 did not meet eligibility criteria  
25 and 12 declined participation. Of 203 patients interviewed, 91 were still using biological  
26 medicine; we established adherence to laboratory monitoring in these patients. In the  
27 total sample, management failed to meet standards of prior use of topical and systemic  
28 medication in 169 (83.2%) of the patients. .Of the 91 patient using biological medicine at  
29 the time of the survey, 23 (25.2%) did not undergo appropriate laboratory tests.  
30  
31  
32  
33  
34

35 [CONCLUSIONS]: Important discrepancies exist between clinical practice and the  
36 recommendations of guidelines the management of plaintiffs using biologic drugs to treat  
37 psoriasis.  
38  
39  
40  
41  
42  
43  
44  
45  
46  
47  
48  
49  
50  
51  
52  
53  
54  
55  
56  
57  
58  
59  
60

### ***Strengths and limitations***

#### Strengths

- We obtained a complete list of all individuals who succeeded in obtaining government payment for biologic agents for psoriasis.
- We contacted and obtained consent from 203 of 218 potentially eligible patients.
- Pharmacy records of medication use and corroborating information from patient interviews ensured accuracy.
- Duplicate review of interview recordings ensured accurate information.
- We surveyed a number of key guidelines including both public agencies and specialty societies from a number of countries and used as criteria only recommendations included in all the guidelines.

#### Limitations

- Patients' memory of prior medication use may not have been accurate.
- We did not obtain corroboration of reports of adverse effects or apparent improvement with the biologic agents.

## INTRODUCTION

Psoriasis, chronic inflammatory immune-mediated skin disease that predominantly affects the skin and joints[1] occurs in between 1.5 to 3% of the population[2]. Onset may occur at any age but peaks in the second and third decades. The severity of psoriasis varies widely, and its course is characterized by relapses and remissions, though it usually persists throughout life. Its negative impact on health-related quality of life is similar to that of ischemic heart disease, diabetes, depression and cancer and severe psoriasis is associated with an increase in mortality [3].

The significant reduction in quality of life and the psychosocial disability suffered by patients highlight the need for prompt, effective treatment, and long-term disease control[4 5]. In mild psoriasis, topical treatment can be effective[6]. Those with moderate to severe disease often require treatment with phototherapy and systemic treatment[7]. When systemic traditional treatment with cyclosporine, methotrexate, or acitretin fail (non-biologic systemic agents or N-BISYS), systemic biological therapies such as the tumor necrosis factor antagonists' adalimumab, etanercept and infliximab, and the monoclonal antibody ustekimumab that targets interleukin-12 (IL-12) and IL-23 become options.[7-10].

Due to their immunosuppressive activity, some anti-TNFs have been associated with a small increased risk of infection in patients with psoriasis[11], and studies of TNF antagonist use in other disease areas have raised concerns over a potential link to cardiovascular side-effects, malignancies, and neurological defects[11-13]. Guidelines uniformly recommend at least one annual patient review to check for infections, malignancies, and other adverse effects of biologics agents.

In Brazil patients can, once they are prescribed by a clinician, go to the courts to force the state to pay for expensive medication such as biologics. Court decisions may not be consistent with optimal standards of care in terms of patients who are appropriate for use of biologics. Furthermore, once patients receive biologics through court decisions, subsequent management may not be optimal.

The objective of this study was to identify standards of management of psoriasis common to major international guidelines and to evaluate the extent to which Brazilian physicians who prescribed biologics that courts approved on the basis of law suits adhered to these standards.

## METHODS

The protocol was authorized by the State Department of Health (SES-SP) and also approved by the ethics committee for clinical research of University of Sorocaba on August 17, 2009, with protocol number 011/2009.

### Choice of Guidelines and Guideline Recommendations

We consulted guidelines from the following countries: United Kingdom[14], Germany[8], Brazil,[10] United States and Canada.[15] We used both national guidelines (NICE, SIGN)[6 7] and specialty society guidelines. We reviewed all recommendations in each guideline and chose as standards only those recommendations that were uniformly endorsed across all guidelines.

Recommendations uniformly endorsed by every guideline[6-10]specified that biologics should only be used in patients with severe psoriasis who had failed to respond to, have a contraindication to, or are intolerant of topical therapies, and at least one systemic therapy (e.g. cyclosporine or methotrexate). Guidelines also uniformly recommend at least one annual patient review to check for infections, malignancies, and other adverse effects of biologics agents and also to evaluate control of psoriasis. Guidelines specified that the review should include monitoring of complete blood cell count and liver function tests.

### Eligibility Criteria

Patients were eligible if they had, through lawsuits filed against the state of São Paulo in the period 2004-2010, gained access to biologics for treatment of psoriasis. All patients gave informed consent.

### Identification of Patients and Collection of Patient Data

In order to identify eligible patients, two researchers abstracted data from all the dispensing orders in the database for psoriasis - identified by ICD code L40 - originating from lawsuits from 2004-2010 including the name, address and telephone number, gender, age, healthcare provider, whether that provider worked in the public or private system, type of biologic dispensed, and diagnoses.

1  
2  
3 We contacted patients with psoriasis by telephone, and if they proved eligible and agreed to  
4 participate in the study, conducted interviews. The interviews were conducted by telephone  
5 using Computer Assisted Telephonic Interviews (ITAC) technology with a microcomputer  
6 handset with headphones. This system allows recording and monitoring of the duration of  
7 the conversation [16 17]. Research staff working in pairs independently recorded data from  
8 the interviews, with discrepancies resolved by the principle investigator (LL).  
9  
10  
11  
12

13  
14 The interview schedule was developed in consultation with a local dermatologist (see  
15 **Appendix**) after consideration of the recommendations consistent across guidelines. An  
16 electronic form was developed in Microsoft Office Access based on the instrument developed  
17 for the interviews. To address the items listed in the instrument, 16 screens were designed to  
18 record the data from the interviews. Each interviewer received training on use of language  
19 related to each question in the interview schedule. The questionnaire included the following:  
20 what drugs the patient was using for the treatment of psoriasis prior to the court judgment, the  
21 time of diagnosis of psoriasis, and whether patients received at least annual review. For  
22 patients still taking biologics we determined if they had received a medical consultation in the  
23 previous year and what tests had been undertaken in the previous year. In Brazil, patients  
24 receive records of all their laboratory tests and typically retain these records indefinitely; all  
25 patients still receiving biologics reported that they had retained records of all of laboratory  
26 tests undertaken during the previous year.  
27  
28  
29  
30  
31  
32  
33  
34  
35

36 Patients' report of the period in which they used the biologics were cross-checked with data  
37 obtained from pharmacy records and from legal records from lawsuits. Legal records from  
38 lawsuits gave us the name of patients, name of the drugs obtained through the law suit,  
39 whether the prescription came from private or public insurance, sex and age of patients. If  
40 we found discrepancy between the three sources of information, we considered the  
41 information from pharmacy records definitive. Thus, definitive information about the name  
42 of the biologic and the duration of use of the biologic was obtained from the pharmacy, and  
43 definitive information of the time of diagnosis, use of previous medicines, and laboratory  
44 results was obtained from the patient. We considered guideline adherence adequate when  
45 court decisions and subsequent clinical care had adhered to all recommendations from  
46 guidelines.  
47  
48  
49  
50  
51  
52  
53  
54  
55  
56  
57  
58  
59  
60

1  
2  
3 In the interviews we also asked patients about their adverse effects and whether these led to  
4 discontinuing medications and their perception of the effectiveness of the biologic agents.  
5  
6  
7

## 8 **RESULTS**

9  
10 We reviewed 25,184 lawsuits that had succeeded in obtaining medicines, dietary  
11 supplements, or other health products, such as orthotics and prosthetics, and diagnostic and  
12 therapeutic procedures in the period deposited in the Public Finance Courts Capital in period  
13 2004 to 2010. Of 218 patients identified as using biologics for psoriasis, in 3 the contact  
14 information was a law office that did not allow us to contact patients, 1 patient had died, 2  
15 had never used the biologic that was mandated by the court decision, and 9 refused the  
16 interview. We interviewed 203 patients, of whom 91 (44.8%) were still using a biologic  
17 agent (Figure 1).  
18  
19  
20  
21  
22  
23  
24  
25

26 Eligible patients received one of four biologic drugs: adalimumab, etanercept, infliximab.  
27 Table 1 presents the socio demographic and medical health characteristics of the 203 eligible  
28 patients as well as the duration patients used the biologic agents granted payment by the  
29 courts. Over a third of the patients used the biologic agents for less than a year, and over  
30 50% for 1 to 3 years.  
31  
32  
33  
34  
35  
36  
37  
38  
39  
40  
41  
42  
43  
44  
45  
46  
47  
48  
49  
50  
51  
52  
53  
54  
55  
56  
57  
58  
59  
60



Table 1 - Baseline characteristics of plaintiffs with psoriasis

|                                             | Patients<br>N=203 | %           |
|---------------------------------------------|-------------------|-------------|
| <b>City of residence</b>                    |                   |             |
| <i>São Paulo</i>                            | 122               | 60          |
| <i>Other</i>                                | 81                | 40          |
| <b>Health care</b>                          |                   |             |
| <i>Private</i>                              | 141               | 69.5        |
| <b>Sex</b>                                  |                   |             |
| <i>Male</i>                                 | 129               | 63.5        |
| <b>Age (years)</b>                          |                   |             |
| <i>19 - 59</i>                              | 156               | 76.9        |
| <i>≥ 60</i>                                 | 47                | 23.1        |
| <i>mean ± sd</i>                            |                   | 48.9 ± 13.7 |
| <b>Time of diagnosis (years previous)</b>   |                   |             |
| <i>6 or more</i>                            | 177               | 84.9        |
| <i>2 - 5</i>                                | 25                | 10.2        |
| <i>≥ 1 year</i>                             | 1                 | 0.5         |
| <b>Comorbidities</b>                        |                   |             |
| <i>None</i>                                 | 128               | 63          |
| <i>Cardiovascular disease</i>               | 26                | 12.8        |
| <i>Diabetes mellitus</i>                    | 12                | 5.9         |
| <i>Others</i>                               | 37                | 18.2        |
| <b>Duration of use of biologic (months)</b> |                   |             |
| <i>12 or less</i>                           | 69                | 34.0        |
| <i>13 to 36</i>                             | 110               | 54.2        |
| <i>37 to 72</i>                             | 24                | 11.8        |

*Sd= standard deviation*

Table 2 presents the use of non-biologic medications prior to the law suit decision to pay for the use of a biologic agent. Over 20% of the patients had not used any conventional interventions - either topical, light, or systemic agents - for psoriasis prior to launching their law suit for use of biologic agents. Topical agents were used very infrequently - in only approximately 16% of patients. Phototherapy was similarly infrequently used - in 32% of the patients. Approximately 71% of the patients had used non-biologic systemic therapy before their law suit. Given that guideline adherence requires use topical and systematic therapy before beginning biologic use, only 10 patients (16.7%) met guideline requirements.

**Table 2 – Treatment prior to initiating law suit for biologic use.**

|                                                                                   | <b>adalimumab</b> | <b>efalizumab</b> | <b>etanercept</b> | <b>infliximab</b> | <b>Total</b>     |
|-----------------------------------------------------------------------------------|-------------------|-------------------|-------------------|-------------------|------------------|
|                                                                                   | <b>14 (6.9)</b>   | <b>43 (21.2)</b>  | <b>35 (17.2)</b>  | <b>111 (54.7)</b> | <b>203 (100)</b> |
| <b>Therapies</b>                                                                  |                   |                   |                   |                   |                  |
| <i>None</i>                                                                       | 1 (7.1)           | 12 (27.9)         | 6 (17.1)          | 25 (22.5)         | 44 (21.7)        |
| <i>Only Topical</i>                                                               | 0                 | 0                 | 0                 | 0                 | 0                |
| <i>Only Phototherapy</i>                                                          | 0 (0.0)           | 5 (11.6)          | 3 (8.7)           | 7 (6.3)           | 15 (7.4)         |
| <i>Only N-BIOSYS#</i>                                                             | 10 (71.4)         | 2 (4.6)           | 12 (34.3)         | 36 (32.4)         | 60 (29.6)        |
| <b>Combination of Therapies prior use of Biologic n (%)</b>                       |                   |                   |                   |                   |                  |
| <i>Topical+ Phototherapy</i>                                                      | 0                 | 0                 | 0                 | 0                 | 0                |
| <i>Topical + N-BIOSYS#</i>                                                        | 1 (7.1)           | 4 (9.3)           | 3 (8.6)           | 16(14.4 )         | 24 (11.8)        |
| <i>Phototherapy + N-BIOSYS#</i>                                                   | 2 ( )             | 18 (41.8)         | 8 (22.8)          | 22 (19.8)         | 50 (24.6)        |
| <i>Topical+Phototherapy+N-BIOSYS#</i>                                             | 0 (0.0)           | 2 (4.6)           | 3 ( 8.6)          | 5 (4.5)           | 10 (4.9)         |
| <b>Recommended use of the biological agents according guidelines (7-10) n (%)</b> |                   |                   |                   |                   |                  |
| <i>Topical + N-BIOSYS</i>                                                         | 1 (7.1)           | 6 (14.0)          | 6 (17.1)          | 21 (18.9)         | 34 (16.7)        |

# acitretin, methotrexate; ciclosporine; sd – standard deviation; PSO – psoriasis

# acitretin, methotrexate; ciclosporin; sd – standard deviation; N-BIOSYS – non biologic systemic agents

Table 3 presents findings in the 91 patients who were still using a biologic agent at the time of the interview. The pattern of prior use was similar to the overall group, with 19.3% of patients having used both a topical agent and systemic therapy. All patients had visited a doctor at least once a year, but 25.2% did not undergo the recommended laboratory tests (blood count, differential count, liver function) (Table 3). Thus, only 14.2% of the patients met guideline criteria for both use of prior agents and appropriate monitoring.

Of the 203 respondents 134 (66%) perceived that they experienced important improvement with use of biologic agents, although 20 patients reported a deterioration they attributed to the biologic agents. Adverse effects severe enough to discontinue medication were reported by 23 patients (11.3%).

**Table 3 - Clinical follow up and outcome judgment in patient with psoriasis still taking biologic agent.**

| Outcomes                                                               | adalimumab<br>9 (9.9) | etanercept<br>22 (62.9) | infliximab<br>60 (54.0) | Total<br>91(100) |
|------------------------------------------------------------------------|-----------------------|-------------------------|-------------------------|------------------|
| <b>Annual Review</b>                                                   |                       |                         |                         |                  |
| <b>A</b> <i>consults*</i>                                              | 9 (100)               | 22 (100)                | 60 (100)                | 91(100)          |
| <b>B</b> <i>laboratorial exams**</i>                                   | 7 (77.8)              | 15 (68.2)               | 46 (76.7)               | 68 (74.8)        |
| <b>Clinical monitoring adequate</b>                                    |                       |                         |                         |                  |
| <b>C</b> <i>A + B</i>                                                  | 7 (77.8)              | 15 (68.9)               | 46 (76.4)               | 68 (74.8)        |
| <b>Therapies</b>                                                       |                       |                         |                         |                  |
| <i>None</i>                                                            | 0 (0.0)               | 3 (13.6)                | 14 (23.3)               | 17 (18.7)        |
| <i>Only Topical</i>                                                    | 0 (0.0)               | 0 (0.0)                 | 0 (0.0)                 | 0 (0.0)          |
| <i>Only Phototherapy</i>                                               | 0 (0.0)               | 1 (4.5)                 | 4 (6.7)                 | 5 (5.5)          |
| <i>Only N-BIOSYS#</i>                                                  | 7 (77.8)              | 9 (40.9)                | 18 (30.0)               | 34 (37.4)        |
| <b>Combination of Therapies prior use of Biologic n (%)</b>            |                       |                         |                         |                  |
| <i>Topical + Phototherapy</i>                                          | 0 (0.0)               | 0 (0.0)                 | 0 (0.0)                 | 0 (0.0)          |
| <b>D</b> <i>Topical + N-BIOSYS#</i>                                    | 1 (11.1)              | 3 (13.6)                | 8 (13.3)                | 12 (13.2)        |
| <i>Phototherapy + N-BIOSYS#</i>                                        | 1 (11.1)              | 4 (18.2)                | 13 (21.7)               | 18 (19.8)        |
| <b>E</b> <i>Topical+Phototherapy+N-BIOSYS</i>                          | 0 (0.0)               | 2 (9.1)                 | 3 (5.0)                 | 5 (5.5)          |
| <b>F Recommended use of the biological agents according guidelines</b> |                       |                         |                         |                  |
| <b>D + E</b>                                                           | 1 (11.1)              | 5 (22.7)                | 11 (18.3)               | 17 (19.3)        |
| <b>Adherence of guideline</b>                                          |                       |                         |                         |                  |
| <i>Prior drugs and monitoring (C + D)</i>                              | 1 (11.1)              | 3 (13.6)                | 9 (15.0)                | 13 (14.2)        |

\*at least one annual medical consult; blood differential (complete blood cell count), liver function tests;  
# use of biologic agent after treatment with topic and one systemic non biologic agent;

## DISCUSSION

### Main Findings

The key finding of this investigation is that very few patients obtaining payment for use of biologic agents for treatment of psoriasis had met guideline criteria for use of non-biologic therapy prior to commencing expensive and potentially toxic biologic agents (Tables 2 and 3). In particular, topical agents had seldom been used in these patients. In addition, approximately 30% had not used any non-biologic systemic agents. Further, of those still using biologic agents approximately 25% had not undergone the recommended laboratory investigations in the prior year. Thus, complete adherence to guideline recommendations for prior therapy occurred in only 16.7% of patients and complete guideline adherence including prior therapy and laboratory monitoring in only 14.2% of those still using biologic agents (Tables 2 and 3).

1  
2  
3 The patients in this sample did not have any contraindication to the use of  
4 immunosuppressive drugs (alcohol, pleural effusion, coagulopathy, uncontrolled infection,  
5 liver disease, ascites or pregnancy) (**Table 1**). However, the prevalent comorbidities detected  
6 in these patients involve the cardiovascular system, the main contraindication to the use of  
7 biological drugs (22). Thus, the pattern of comorbidity raises further concern regarding the  
8 use of biologic agents without, in approximately 30%, the prior use of non-biologic  
9 immunosuppressant therapy.  
10  
11  
12  
13

### 14 ***Strengths and limitations***

15  
16  
17  
18 Strengths of this study include our ability to obtain a complete list of all individuals who  
19 succeeded in obtaining government payment for biologic agents for psoriasis. We were able  
20 to contact and obtain consent from 203 or 218 potentially eligible patients. We obtained  
21 pharmacy records of medication use and corroborating information from patient interviews.  
22 Duplicate review of interview recordings ensured accurate information. We surveyed a  
23 number of key guidelines including both public agencies and specialty societies from a  
24 number of countries and used as criteria only recommendations included in all the guidelines.  
25  
26  
27  
28

29  
30  
31 Possible limitations in our study include the possibility that patients memory of prior  
32 medication use may not have been accurate. In particular, approximately 20% of patients  
33 reported no prior topical, phototherapy, or system therapy prior to use of biologic agents. The  
34 interviews, however, included detailed descriptions of medications, including topical agents,  
35 and patients failure to remember the use of topical agents may be implausible. We did not  
36 obtain corroboration of reports of adverse effects or apparent improvement with the biologic  
37 agents, and these data are therefore suspect.  
38  
39  
40  
41  
42  
43

### 44 ***Relation to evidence and recommendations***

45  
46  
47 The guidelines we reviewed were consistent in their recommendation that patients with  
48 severe psoriasis who do not respond or have a contraindication to or are intolerant to topical  
49 therapy and systemic therapy with immunosuppressant, including cyclosporine and  
50 methotrexate, are candidates for biologic therapies [6-9 15]. The guidelines also  
51 recommended phototherapy as an alternative. Despite evidence of the cost-effectiveness of  
52 phototherapy in moderate-to-severe psoriasis [18 19], guidelines did not insist on a trial of  
53 phototherapy before treatment with biologic agents. .  
54  
55  
56  
57  
58  
59  
60

1  
2  
3 Biologic agents may be associated with serious side effects, including an increase in the risk  
4 of malignancies opportunistic fungal infection, and lymphoma [11-13]. A particular concern  
5 is the use of drugs over the long term. Current the data available is insufficient to draw clear  
6 and reliable conclusions about either the efficacy of long-term treatments or the frequency of  
7 adverse effects over the long term [20-22]. The majority of plaintiffs are using biologics for  
8 over a year, and more than 10% for over three years, raising another possible concern.  
9  
10  
11  
12

### 13 ***Implications.***

14  
15  
16 Biologic agents are not included in Brazilian official guideline to treat psoriasis. Therefore,  
17 access to this medication is largely from prescriptions by private practioners. Having  
18 obtained a prescription for a biologic agent, Brazilian citizen can launch legal action to have  
19 the government pay for the high cost medication. It is perhaps ironic that despite the last  
20 report of the Brazilian health assessment technology committee (Conitec) choosing to not  
21 recommend (1) the use of these biological drugs in the treatment of psoriasis primarily  
22 because of safety concerns, judicial decisions in favor of their use requires the public health  
23 system to provide funding.  
24  
25  
26  
27  
28  
29

30 Irrespective of issues of whether governments should fund biologics in psoriasis at all,  
31 clinical practice and judicial decisions should be consistent with highly credible international  
32 guidelines. Our results show an important gap between clinical practice and judicial  
33 decisions in treatments prescribed to plaintiffs demanding medicines for PSO in São Paulo,  
34 Brazil and corresponding guidelines.  
35  
36  
37  
38

39 Explanations for inappropriate practice include inadequate training and knowledge of the  
40 physicians who prescribe the drugs (22, 29). Another possibility is that incentives from the  
41 pharmaceutical industry are influencing the prescription of biologic agents in psoriasis.  
42 Whatever the reason, our findings demonstrate that the court system is not functioning well.  
43 Independent review by disinterested experts would have led the court to insist on appropriate  
44 prior treatment before considering biologic agents. The health system also appears negligent  
45 in not ensuring optimal follow-up to patients who receive payment for their drugs from the  
46 government. Our results suggest changes at both the level of clinical practice and the  
47 function of the judicial system are urgently needed.  
48  
49  
50  
51  
52  
53  
54  
55  
56  
57  
58  
59  
60

1  
2  
3 What is already known on this subject?  
4

5 Guidelines specify the circumstances in which biologic agents should be used in patients with  
6 psoriasis and the monitoring such patients should undergo. The extent to which clinicians  
7 follow these guidelines in a variety of clinical situations remains uncertain.  
8  
9

10  
11  
12 What this study adds?  
13

14 In Brazil, major discrepancies exist between the management of patients who receive funding  
15 for biologic agents from the government through lawsuits and the management guidelines  
16 recommend. The majority of patients have not had the appropriate trials of less toxic drugs,  
17 and laboratory monitoring is suboptimal in approximately 25% of patients.  
18  
19

### 20 21 22 *Acknowledgements* 23

24 The authors thanks support from FAPESP (Foundation for Research Support of the State of  
25 São Paulo) Process number 2009/0530841, at UNISO (University of Sorocaba), and  
26 pharmaceuticals Livia Marengo and Andressa Marcondes and Larissa Colombo Marcondes,  
27 Bruna Cipriano that have helped use doing part of extraction and interview of patients. We  
28 also thanks CODES SES-SP (Strategic Coordination Demands of Ministry of Health of São  
29 Paulo) for the cooperation in give us the data from the database and help us to find the  
30 lawsuit papers in their files  
31  
32  
33  
34  
35  
36

37 **Contributors:** LL, IC and CC had the original idea and they developed the study protocol.  
38 GG, LL, MS and CC performed data analysis and drafted the manuscript. MS, FSDF, SBF  
39 and IC contributed to data collection. All authors contributed to the preparation of the  
40 manuscript and read and approved the final version.  
41

42 **Competing interests:** none.  
43

44 **Ethics approval:** this study is part of PSAR Project approved by committee for clinical  
45 research of University of Sorocaba on August 17, 2009, with protocol number 011/2009.  
46  
47  
48  
49  
50  
51  
52

### 53 **REFERENCES** 54

55  
56 1. Griffiths CE, JN. B. Pathogenesis and clinical features of psoriasis. Lancet 2007;**370**(9583):263-71  
57  
58  
59  
60

2. Zachariae H. Prevalence of joint disease in patients with psoriasis: implications for therapy. *Am J Clin Dermatol* 2003;**4**:441-7
3. Rapp SR, Feldman SR, Exum ML, et al. Psoriasis causes as much disability as other major medical diseases. *J Am Acad Dermatol* 1999;**41**(3 Pt 1):401-7
4. Menter A, CE. G. Current and future management of psoriasis. *Lancet* 2007;**370**:272-84
5. Smith CH, JNWN B. Psoriasis and its management. *BMJ Publishing* 2006;**333**:380-4
6. NICE. Psoriasis: the assessment and management of psoriasis. National Institute for Health and Clinical Excellence - Clinical Guidelines 2012
7. SIGN. Scottish Intercollegiate Guidelines Network . Diagnosis and management of psoriasis and psoriatic arthritis in adults. A national clinical guideline. Edinburgh (Scotland): Scottish Intercollegiate Guidelines Network (SIGN) 2010 **121**:65 p
8. Nast A, Boehncke WH, Mrowietz U, et al. S3 - Guidelines on the treatment of psoriasis vulgaris (English version). Update. *Journal der Deutschen Dermatologischen Gesellschaft = Journal of the German Society of Dermatology : JDDG* 2012;**10 Suppl 2**:S1-95 doi: 10.1111/j.1610-0387.2012.07919.x[published Online First: Epub Date]].
9. Smith CH, Anstey AV, Barker JN, et al. British Association of Dermatologists' guidelines for biologic interventions for psoriasis 2009. *The British journal of dermatology* 2009;**161**(5):987-1019 doi: 10.1111/j.1365-2133.2009.09505.x[published Online First: Epub Date]].
10. SBD. Consenso Brasileiro de Psoríase 2012 - Guias de avaliação e tratamento Sociedade Brasileira de Dermatologia. – 2 ed. Rio de Janeiro: Sociedade Brasileira de Dermatologia. 2012
11. Dommasch ED, Abuabara K, Shin DB, et al. The risk of infection and malignancy with tumor necrosis factor antagonists in adults with psoriatic disease: a systematic review and meta-analysis of randomized controlled trials. *J Am Acad Dermatol* 2011;**64**(6):1035-50 doi: 10.1016/j.jaad.2010.09.734[published Online First: Epub Date]].
12. Bongartz T, Sutton AJ, Sweeting MJ, et al. Anti-TNF antibody therapy in rheumatoid arthritis and the risk of serious infections and malignancies: systematic review and meta-analysis of rare harmful effects in randomized controlled trials. *JAMA : the journal of the American Medical Association* 2006;**295**(19):2275-85 doi: 10.1001/jama.295.19.2275[published Online First: Epub Date]].
13. Singh JA, Wells GA, Christensen R, et al. Adverse effects of biologics: a network meta-analysis and Cochrane overview. *Cochrane database of systematic reviews* 2011(2):CD008794 doi: 10.1002/14651858.CD008794.pub2[published Online First: Epub Date]].
14. Psoriasis: the assessment and management of psoriasis. National Institute for Health and Clinical Excellence - Clinical Guidelines 2012
15. Papp K, Gulliver W, Lynde C, et al. Canadian guidelines for the management of plaque psoriasis: overview. *Journal of cutaneous medicine and surgery* 2011;**15**(4):210-9
16. GRUPO. IBOPE INTELIGÊNCIA. Coleta de dados. Diversos métodos para atender à sua demanda. Publicação em 28/04/2009. <http://www.ibope.com.br>. Acesso em 28 ju. 2011. 2011
17. LIPE. PESQUISAS. Dúvidas frequentes: o que é CATI ? Disponível em <http://www.lipe.com.br>. Acesso em 28 jul. 2011. 2011
18. Miller DW, Feldman SR. Cost-effectiveness of moderate-to-severe psoriasis treatment. *Expert opinion on pharmacotherapy* 2006;**7**(2):157-67 doi: 10.1517/14656566.7.2.157[published Online First: Epub Date]].
19. Pearce DJ, Thomas CG, Fleischer AB, Jr., et al. The cost of psoriasis therapies: considerations for therapy selection. *Dermatology nursing / Dermatology Nurses' Association* 2004;**16**(5):421-8, 32
20. Lucka TC, Pathirana D, Sammain A, et al. Efficacy of systemic therapies for moderate-to-severe psoriasis: a systematic review and meta-analysis of long-term treatment. *Journal of the European Academy of Dermatology and Venereology* 2012;**26**(11):1331-44 doi: 10.1111/j.1468-3083.2012.04492.x[published Online First: Epub Date]].

- 1
- 2
- 3 21. Schmitt J, Zhang Z, Wozel G, et al. Efficacy and tolerability of biologic and nonbiologic systemic
- 4 treatments for moderate-to-severe psoriasis: meta-analysis of randomized controlled trials.
- 5 The British journal of dermatology 2008;**159**(3):513-26 doi: 10.1111/j.1365-
- 6 2133.2008.08732.x[published Online First: Epub Date]].
- 7
- 8 22. Naldi L, Razny B. Psoriasis (chronic plaque). Clinical evidence 2009;**1706**(1):1-109
- 9
- 10
- 11
- 12
- 13
- 14
- 15
- 16
- 17
- 18
- 19
- 20
- 21
- 22
- 23
- 24
- 25
- 26
- 27
- 28
- 29
- 30
- 31
- 32
- 33
- 34
- 35
- 36
- 37
- 38
- 39
- 40
- 41
- 42
- 43
- 44
- 45
- 46
- 47
- 48
- 49
- 50
- 51
- 52
- 53
- 54
- 55
- 56
- 57
- 58
- 59
- 60

For peer review only





## Adherence to guidelines in use of biological agents to treat psoriasis in Brazil

|                                                                                                                                                                                    |                                                                                                                                                                                                                                                                                                                                                                                                                                                                                      |
|------------------------------------------------------------------------------------------------------------------------------------------------------------------------------------|--------------------------------------------------------------------------------------------------------------------------------------------------------------------------------------------------------------------------------------------------------------------------------------------------------------------------------------------------------------------------------------------------------------------------------------------------------------------------------------|
| Journal:                                                                                                                                                                           | <i>BMJ Open</i>                                                                                                                                                                                                                                                                                                                                                                                                                                                                      |
| Manuscript ID:                                                                                                                                                                     | bmjopen-2013-004179.R1                                                                                                                                                                                                                                                                                                                                                                                                                                                               |
| Article Type:                                                                                                                                                                      | Research                                                                                                                                                                                                                                                                                                                                                                                                                                                                             |
| Date Submitted by the Author:                                                                                                                                                      | 26-Dec-2013                                                                                                                                                                                                                                                                                                                                                                                                                                                                          |
| Complete List of Authors:                                                                                                                                                          | Silveira, Miriam; UNISO, Pharmaceutical Science de Camargo, Iara; UNISO, Pharmaceutical Science Osorio-de-Castro, Claudia; FIOCRUZ, ENSP - Núcleo de Assistência Farmacêutica Barberato-Filho, Silvio; UNISO, Pharmaceutical Science Del Fiol, Fernando; UNISO, Pharmaceutical Science Guyatt, Gordon; McMaster University, Clinical Epidemiology and Biostatistics de Camargo, MaYARA; UNISO, Pharmaceutical Sciences Post graduate Course Lopes, Luciane; UNISO, Pharmacie Science |
| <b>Primary Subject Heading</b>:                                                                                                                                                    | Public health                                                                                                                                                                                                                                                                                                                                                                                                                                                                        |
| Secondary Subject Heading:                                                                                                                                                         | Evidence based practice, Dermatology, Medical education and training, Pharmacology and therapeutics, Public health                                                                                                                                                                                                                                                                                                                                                                   |
| Keywords:                                                                                                                                                                          | CLINICAL PHARMACOLOGY, Psoriasis < DERMATOLOGY, Health policy < HEALTH SERVICES ADMINISTRATION & MANAGEMENT, Protocols & guidelines < HEALTH SERVICES ADMINISTRATION & MANAGEMENT                                                                                                                                                                                                                                                                                                    |
| <p>Note: The following files were submitted by the author for peer review, but cannot be converted to PDF. You must view these files (e.g. movies) online.</p> <p>Figure 1.emf</p> |                                                                                                                                                                                                                                                                                                                                                                                                                                                                                      |

SCHOLARONE™  
Manuscripts

**TITLE: Adherence to guidelines in use of biological agents to treat psoriasis in Brazil**

**AUTHORS**

**Miriam Sanches do Nascimento Silveira, MSc**

*Pharmaceutical Sciences Post graduate Course, University of Sorocaba, UNISO, Brazil.*  
*miriam.silveira@prof.uniso.br*

**Iara Alves de Camargo MSc**

*Pharmaceutical Sciences Post graduate Course, University of Sorocaba, UNISO, Brazil. Codes -  
Secretaria Estadual de Saúde – São Paulo*  
*iadec@uol.com.br*

**Mayara Costa de Camargo**

*Pharmaceutical Sciences Post graduate Course, University of Sorocaba, UNISO, Brazil*  
*mah-camargo@hotmail.com*

**Claudia Garcia Serpa Osorio-de-Castro, PhD**

*Núcleo de Assistência Farmacêutica, Escola Nacional de Saúde Pública Sérgio Arouca - Fundação  
Oswaldo Cruz – Fiocruz*  
*claudia.osorio@ensp.fiocruz.br*

**Silvio Barberato-Filho, PhD**

*Programa de Pós-Graduação em Ciências Farmacêuticas da Universidade de Sorocaba, SP*  
*silvio.barberato@prof.uniso.br*

**Fernando de Sá Del Fiol, PhD**

*Programa de Pós-Graduação em Ciências Farmacêuticas da Universidade de Sorocaba, SP*  
*fernando.fiol@prof.uniso.br*

**Gordon Guyatt MD, MSc**

*Department of Clinical Epidemiology and Biostatistics, McMaster University, Canada.*  
*guyatt@mcmaster.ca*

**Luciane Cruz Lopes, PhD**

*Pharmaceutical Sciences Post graduate Course, University of Sorocaba, UNISO, Brazil.*  
*luslopes@terra.com.br*

**Contact information for the corresponding author:** Luciane Cruz Lopes,  
*luslopes@terra.com.br*

- ✓ **Financial support:** FAPESP – Fundação de Amparo a Pesquisa - Process N. 2009/53084-1
- ✓ **No conflict of interest**
- ✓ **Word count: 2284**
- ✓ **Protocol approved ethics committee: 11/2009**
- ✓ **There is no additional data available**
- ✓ **Key words:** psoriasis, biological, guidelines, health public, policy, Brazil.

✓ **TITLE: Adherence to guidelines in use of biological agents to treat psoriasis in Brazil**

**ABSTRACT**

[BACKGROUND]: In São Paulo, Brazil, patients gain funding for biological agents for treatment of psoriasis through lawsuits to the government. The extent to which management of such patients adhere to authoritative guidelines is uncertain.

[OBJECTIVE]: To determine the extent to which clinical practice adheres to authoritative guidelines in patients receiving treatment for psoriasis through lawsuits.

[METHODS]: We identified patients through records of the State Health Secretariat of São Paulo from 2004 to 2011. We consulted guidelines from five countries and chose as standards only those recommendations that the guidelines uniformly endorsed. Pharmacy records provided data regarding biologic use. Guidelines recommended biologics agents only in patients with severe psoriasis who have failed to respond to both topical and systemic therapies (e.g. cyclosporine and methotrexate) and recommended yearly monitoring of blood counts and liver function.

[RESULTS]: Of 218 patients identified in the database, 3 did not meet eligibility criteria and 12 declined participation. Of 203 patients interviewed, 91 were still using biological medicine; we established adherence to laboratory monitoring in these patients. In the total sample, management failed to meet standards of prior use of topical and systemic medication in 169 (83.2%) of the patients. .Of the 91 patient using biological medicine at the time of the survey, 23 (25.2%) did not undergo appropriate laboratory tests.

[CONCLUSIONS]: Important discrepancies exist between clinical practice and the recommendations of guidelines the management of plaintiffs using biologic drugs to treat psoriasis.

**Strengths and limitations**

1. Strengths of this study include our ability to obtain a complete list of all individuals who succeeded in obtaining government payment for biologic agents for psoriasis.
2. We obtained pharmacy records of medication use and corroborating information from patient interviews.
3. Duplicate review of interview recordings ensured accurate information.
4. Possible limitations in our study include the possibility that patients memory of prior medication use may not have been accurate.
5. The interviews, however, included detailed descriptions of medications, including topical agents, and patients' failure to remember the use of topical agents may be implausible.
6. We did not obtain corroboration of reports of adverse effects or apparent improvement with the biologic agents, and these data are therefore suspect.
7. We did not study the management of patients who have received biologics through the usual health care system.

## INTRODUCTION

Psoriasis, chronic inflammatory immune-mediated skin disease that predominantly affects the skin and joints occurs in between 1.5 to 3% of the population[1]. Onset may occur at any age but peaks in the second and third decades. The severity of psoriasis varies widely, and its course is characterized by relapses and remissions, though it usually persists throughout life. Its negative impact on health-related quality of life is similar to that of ischemic heart disease, diabetes, depression and cancer [2].

The significant reduction in quality of life and the psychosocial disability suffered by patients highlight the need for prompt, effective treatment, and long-term disease control[3 4]. In mild psoriasis, topical treatment can be effective[5]. Those with moderate to severe disease often require treatment with phototherapy and systemic treatment[6]. When systemic traditional treatment with cyclosporine, methotrexate, or acitretin fail (non-biologic systemic agents or N-BISYS), systemic biological therapies such as the tumor necrosis factor antagonists' adalimumab, etanercept and infliximab, and the monoclonal antibody ustekimumab that targets interleukin-12 (IL-12) and IL-23 become options.[6-9].

Due to their immunosuppressive activity, some anti-TNFs have been associated with a small increased risk of infection in patients with psoriasis[10], and studies of TNF antagonist use in other disease areas have raised concerns over a potential link to cardiovascular side-effects, malignancies, and neurological defects[10-12]. Guidelines uniformly recommend at least one annual patient review to check for infections, malignancies, and other adverse effects of biologics agents.

In Brazil patients can, once they are prescribed by a clinician, go to the courts to force the state to pay for expensive medication such as biologics. Court decisions may not be consistent with optimal standards of care in terms of patients who are appropriate for use of biologics. Furthermore, once patients receive biologics through court decisions, subsequent management may not be optimal.

The objective of this study was to identify standards of management of psoriasis common to major international guidelines and to evaluate the extent to which Brazilian physicians who prescribed biologics that courts approved on the basis of law suits adhered to these standards.

## METHODS

The protocol (cross-sectional design) was authorized by the State Department of Health (SES-SP) and also approved by the ethics committee for clinical research of University of Sorocaba on August 17, 2009, with protocol number 011/2009.

### Choice of Guidelines and Guideline Recommendations

We consulted guidelines from the following countries: United Kingdom[13], Germany[7], Brazil,[9] United States[14], Canada[15] and European[16]. We used both national guidelines (NICE, SIGN)[5 6] and specialty society guidelines. We reviewed all recommendations in each guideline and chose as standards only those recommendations that for prior treatment were uniformly endorsed across all guidelines and for monitoring were endorsed by 4 of the 5 guidelines.

Recommendations uniformly endorsed by every guideline[5-9] specified that biologics should only be used in patients with severe psoriasis who had failed to respond to, have a contraindication to, or are intolerant of topical therapies, and at least one systemic therapy (e.g. cyclosporine or methotrexate). Guidelines also uniformly recommend at least one annual patient review to check for infections, malignancies, and other adverse effects of biologics agents and also to evaluate control of psoriasis. Guidelines specified that the review should include monitoring of complete blood cell count and liver function tests.

### Eligibility Criteria

Patients were eligible if they had, through lawsuits filed against the state of São Paulo in the period 2004-2010, gained access to biologics for treatment of psoriasis. All patients gave informed consent.

### Identification of Patients and Collection of Patient Data

In order to identify eligible patients, two researchers abstracted data from all the dispensing orders in the database for psoriasis - identified by ICD code L40 - originating from lawsuits from 2004-2010 including the name, address and telephone number, gender, age, healthcare provider, whether that provider worked in the public or private system, type of biologic dispensed, and diagnoses. We excluded patient with arthritis psoriatic.

1  
2  
3 We contacted patients with psoriasis by telephone, and if they proved eligible and agreed to  
4 participate in the study, conducted interviews. The interviews were conducted by telephone  
5 using Computer Assisted Telephonic Interviews (ITAC) technology with a microcomputer  
6 handset with headphones. This system allows recording and monitoring of the duration of  
7 the conversation [17 18]. Research staff working in pairs independently recorded data from  
8 the interviews, with discrepancies resolved by the principle investigator (LL).  
9  
10  
11  
12

13  
14 The interview schedule was developed in consultation with a local dermatologist (see  
15 **Appendix**) after consideration of the recommendations consistent across guidelines. An  
16 electronic form was developed in Microsoft Office Access based on the instrument developed  
17 for the interviews. To address the items listed in the instrument, 16 screens were designed to  
18 record the data from the interviews. Each interviewer received training on use of language  
19 related to each question in the interview schedule. The questionnaire included the following:  
20 what drugs the patient was using for the treatment of psoriasis prior to the court judgment, the  
21 time of diagnosis of psoriasis, comorbidities and whether patients received at least annual  
22 review. For patients still taking biologics we determined if they had received a medical  
23 consultation in the previous year and what tests had been undertaken in the previous year. In  
24 Brazil, patients receive records of all their laboratory tests and typically retain these records  
25 indefinitely; all patients still receiving biologics reported that they had retained records of all  
26 of laboratory tests undertaken during the previous year.  
27  
28  
29  
30  
31  
32  
33  
34  
35

36 Patients' report of the period in which they used the biologics were cross-checked with data  
37 obtained from pharmacy records and from legal records from lawsuits. Legal records from  
38 lawsuits gave us the name of patients, name of the drugs obtained through the law suit,  
39 whether the prescription came from private or public insurance, sex, diagnostic and age of  
40 patients. If we found discrepancy between the three sources of information, we considered  
41 the information from pharmacy records definitive. Thus, definitive information about the  
42 name of the biologic and the duration of use of the biologic was obtained from the pharmacy,  
43 and definitive information of the time of diagnosis, use of previous medicines, and laboratory  
44 results was obtained from the patient. We considered guideline adherence adequate when  
45 court decisions and subsequent clinical care had adhered to all recommendations from  
46 guidelines.  
47  
48  
49  
50  
51  
52  
53  
54  
55  
56  
57  
58  
59  
60

1  
2  
3 In the interviews we also asked patients about their adverse effects and whether these led to  
4 discontinuing medications and their perception of the effectiveness of the biologic agents.  
5  
6  
7

## 8 **RESULTS**

9  
10 We reviewed 25,184 lawsuits that had succeeded in obtaining medicines, dietary  
11 supplements, or other health products, such as orthotics and prosthetics, and diagnostic and  
12 therapeutic procedures in the period deposited in the Public Finance Courts Capital in period  
13 2004 to 2010. Of 218 patients identified as using biologics for psoriasis, in 3 the contact  
14 information was a law office that did not allow us to contact patients, 1 patient had died, 2  
15 had never used the biologic that was mandated by the court decision, and 9 refused the  
16 interview. We interviewed 203 patients, of whom 91 (44.8%) were still using a biologic  
17 agent (Figure 1).  
18  
19  
20  
21  
22  
23  
24  
25

26 Eligible patients received one of four biologic drugs: adalimumab, etanercept, infliximab and  
27 efalizumab. Table 1 presents the socio demographic and medical health characteristics of the  
28 203 eligible patients as well as the duration patients used the biologic agents granted payment  
29 by the courts. Over a third of the patients used the biologic agents for less than a year, and  
30 over 50% for 1 to 3 years.  
31  
32  
33  
34  
35  
36  
37  
38  
39  
40  
41  
42  
43  
44  
45  
46  
47  
48  
49  
50  
51  
52  
53  
54  
55  
56  
57  
58  
59  
60



**Table 1 - Baseline characteristics of plaintiffs with psoriasis**

|                                             | Patients<br>N=203 | %           |
|---------------------------------------------|-------------------|-------------|
| <b>City of residence</b>                    |                   |             |
| <i>São Paulo</i>                            | 122               | 60          |
| <i>Other</i>                                | 81                | 40          |
| <b>Health care</b>                          |                   |             |
| <i>Private</i>                              | 141               | 69.5        |
| <b>Sex</b>                                  |                   |             |
| <i>Male</i>                                 | 129               | 63.5        |
| <b>Age (years)</b>                          |                   |             |
| <i>19 - 59</i>                              | 156               | 76.9        |
| <i>≥ 60</i>                                 | 47                | 23.1        |
| <i>mean ± sd</i>                            |                   | 48.9 ± 13.7 |
| <b>Time of diagnosis (years previous)</b>   |                   |             |
| <i>6 or more</i>                            | 177               | 84.9        |
| <i>2 - 5</i>                                | 25                | 10.2        |
| <i>≤1 year</i>                              | 1                 | 0.5         |
| <b>Comorbidities</b>                        |                   |             |
| <i>None</i>                                 | 128               | 63          |
| <i>Cardiovascular disease</i>               | 26                | 12.8        |
| <i>Diabetes mellitus</i>                    | 12                | 5.9         |
| <i>Others</i>                               | 37                | 18.2        |
| <b>Duration of use of biologic (months)</b> |                   |             |
| <i>12 or less</i>                           | 69                | 34.0        |
| <i>13 to 36</i>                             | 110               | 54.2        |
| <i>37 to 72</i>                             | 24                | 11.8        |

*Sd= standard deviation*

Table 2 presents the use of non-biologic medications prior to the law suit decision to pay for the use of a biologic agent. Over 20% of the patients had not used any conventional interventions - either topical, light, or systemic agents - for psoriasis prior to launching their law suit for use of biologic agents. Topical agents were used very infrequently - in only approximately 16% of patients. Phototherapy was similarly infrequently used - in 36.9% of the patients. Approximately 71% of the patients had used non-biologic systemic therapy before their law suit. No patients had contraindications, or were using drugs with problematic interactions, that would have prevented the use of all recommended systemic agents (cyclosporine, methotrexate, and acitretin). Given that guideline adherence requires use topical and systematic therapy before beginning biologic use, only 34 patients (16.7%) met guideline requirements.

**Table 2 – Treatment prior to initiating law suit for biologic use.**

|                                                                                   | adalimumab | efalizumab | etanercept | infliximab | Total     |
|-----------------------------------------------------------------------------------|------------|------------|------------|------------|-----------|
|                                                                                   | 14 (6.9)   | 43 (21.2)  | 35 (17.2)  | 111 (54.7) | 203 (100) |
| <b>Therapies</b>                                                                  |            |            |            |            |           |
| None                                                                              | 1 (7.1)    | 12 (27.9)  | 6 (17.1)   | 25 (22.5)  | 44 (21.7) |
| Only Topical                                                                      | 0          | 0          | 0          | 0          | 0         |
| Only Phototherapy                                                                 | 0 (0.0)    | 5 (11.6)   | 3 (8.7)    | 7 (6.3)    | 15 (7.4)  |
| Only N-BIOSYS#                                                                    | 10 (71.4)  | 2 (4.6)    | 12 (34.3)  | 36 (32.4)  | 60 (29.6) |
| <b>Combination of Therapies prior use of Biologic n (%)</b>                       |            |            |            |            |           |
| Topical+ Phototherapy                                                             | 0          | 0          | 0          | 0          | 0         |
| Topical + N-BIOSYS#                                                               | 1 (7.1)    | 4 (9.3)    | 3 (8.6)    | 16(14.4 )  | 24 (11.8) |
| Phototherapy + N-BIOSYS#                                                          | 2 ( )      | 18 (41.8)  | 8 (22.8)   | 22 (19.8)  | 50 (24.6) |
| Topical+Phototherapy+N-BIOSYS#                                                    | 0 (0.0)    | 2 (4.6)    | 3 ( 8.6)   | 5 (4.5)    | 10 (4.9)  |
| <b>Recommended use of the biological agents according guidelines (7-10) n (%)</b> |            |            |            |            |           |
| Topical + N-BIOSYS                                                                | 1 (7.1)    | 6 (14.0)   | 6 (17.1)   | 21 (18.9)  | 34 (16.7) |

# acitretin, methotrexate; ciclosporine; sd – standard deviation; PSO – psoriasis

# acitretin, methotrexate; ciclosporin; sd – standard deviation; N-BIOSYS – non biologic systemic agents

Table 3 presents findings in the 91 patients who were still using a biologic agent at the time of the interview. The pattern of prior use was similar to the overall group, with 19.3% of patients having used both a topical agent and systemic therapy. All patients had visited a doctor at least once a year, but 25.2% did not undergo the recommended laboratory tests (blood count, differential count, liver function) (Table 3). Thus, only 14.2% of the patients met guideline criteria for both use of prior agents and appropriate monitoring.

Of the 203 respondents 134 (66%) perceived that they experienced important improvement with use of biologic agents, although 20 patients reported a deterioration they attributed to the biologic agents. Adverse effects severe enough to discontinue medication were reported by 23 patients (11.3%).

**Table 3 - Clinical follow up and outcome judgment in patient with psoriasis still taking biologic agent.**

| Outcomes                                                               | adalimumab<br>9 (9.9) | etanercept<br>22 (62.9) | infliximab<br>60 (54.0) | Total<br>91(100) |
|------------------------------------------------------------------------|-----------------------|-------------------------|-------------------------|------------------|
| <b>Annual Review</b>                                                   |                       |                         |                         |                  |
| <i>A</i> consults*                                                     | 9 (100)               | 22 (100)                | 60 (100)                | 91(100)          |
| <i>B</i> laboratorial exams**                                          | 7 (77.8)              | 15 (68.2)               | 46 (76.7)               | 68 (74.8)        |
| <b>Clinical monitoring adequate</b>                                    |                       |                         |                         |                  |
| <i>C</i> <i>A</i> + <i>B</i>                                           | 7 (77.8)              | 15 (68.9)               | 46 (76.4)               | 68 (74.8)        |
| <b>Therapies</b>                                                       |                       |                         |                         |                  |
| <i>None</i>                                                            | 0 (0.0)               | 3 (13.6)                | 14 (23.3)               | 17 (18.7)        |
| <i>Only Topical</i>                                                    | 0 (0.0)               | 0 (0.0)                 | 0 (0.0)                 | 0 (0.0)          |
| <i>Only Phototherapy</i>                                               | 0 (0.0)               | 1 (4.5)                 | 4 (6.7)                 | 5 (5.5)          |
| <i>Only N-BIOSYS#</i>                                                  | 7 (77.8)              | 9 (40.9)                | 18 (30.0)               | 34 (37.4)        |
| <b>Combination of Therapies prior use of Biologic n (%)</b>            |                       |                         |                         |                  |
| <i>Topical</i> + <i>Phototherapy</i>                                   | 0 (0.0)               | 0 (0.0)                 | 0 (0.0)                 | 0 (0.0)          |
| <i>D</i> <i>Topical</i> + <i>N-BIOSYS#</i>                             | 1 (11.1)              | 3 (13.6)                | 8 (13.3)                | 12 (13.2)        |
| <i>Phototherapy</i> + <i>N-BIOSYS#</i>                                 | 1 (11.1)              | 4 (18.2)                | 13 (21.7)               | 18 (19.8)        |
| <i>E</i> <i>Topical</i> + <i>Phototherapy</i> + <i>N-BIOSYS</i>        | 0 (0.0)               | 2 (9.1)                 | 3 (5.0)                 | 5 (5.5)          |
| <b>F Recommended use of the biological agents according guidelines</b> |                       |                         |                         |                  |
| <i>D</i> + <i>E</i>                                                    | 1 (11.1)              | 5 (22.7)                | 11 (18.3)               | 17 (19.3)        |
| <b>Adherence of guideline</b>                                          |                       |                         |                         |                  |
| <i>Prior drugs and monitoring (C + D)</i>                              | 1 (11.1)              | 3 (13.6)                | 9 (15.0)                | 13 (14.2)        |

\*at least one annual medical consult; blood differential (complete blood cell count), liver function tests;

# use of biologic agent after treatment with topic and one systemic non biologic agent;

## DISCUSSION

### Main Findings

The key finding of this investigation is that very few patients obtaining payment for use of biologic agents for treatment of psoriasis had met guideline criteria for use of non-biologic therapy prior to commencing expensive and potentially toxic biologic agents (Tables 2 and 3). In particular, topical agents had seldom been used in these patients. In addition, approximately 30% had not used any non-biologic systemic agents. Further, of those still using biologic agents approximately 25% had not undergone the recommended laboratory investigations in the prior year. Thus, complete adherence to guideline recommendations for

1  
2  
3 prior therapy occurred in only 16.7% of patients and complete guideline adherence including  
4 prior therapy and laboratory monitoring in only 14.2% of those still using biologic agents  
5  
6 (Tables 2 and 3).  
7

8  
9 The patients in this sample did not have heart failure, the only universally agreed upon  
10 contraindication to the use of immunosuppressive drugs (**Table 1**). However, the prevalent  
11 comorbidities detected in these patients involve the cardiovascular system, the main  
12 contraindication to the use of biological drugs (22). Thus, the pattern of comorbidity raises  
13 further concern regarding the use of biologic agents without, in approximately 30%, the prior  
14 use of non-biologic immunosuppressant therapy.  
15  
16  
17  
18

### 19 ***Strengths and weaknesses of the study***

20  
21 Strengths of this study include our ability to obtain a complete list of all individuals who  
22 succeeded in obtaining government payment for biologic agents for psoriasis. We were able  
23 to contact and obtain consent from 203 or 218 potentially eligible patients. We obtained  
24 pharmacy records of medication use and corroborating information from patient interviews.  
25 Duplicate review of interview recordings ensured accurate information. We surveyed a  
26 number of key guidelines including both public agencies and specialty societies from a  
27 number of countries and used as criteria only recommendations included in all the guidelines.  
28  
29  
30  
31  
32

33  
34 Possible limitations in our study include the possibility that patient's memory of prior  
35 medication use may not have been accurate. In particular, approximately 20% of patients  
36 reported no prior topical, phototherapy, or system therapy prior to use of biologic agents. The  
37 interviews, however, included detailed descriptions of medications, including topical agents,  
38 and patients' failure to remember the use of topical agents may be implausible. We did not  
39 obtain corroboration of reports of adverse effects or apparent improvement with the biologic  
40 agents, and these data are therefore suspect.  
41  
42  
43  
44

45  
46 Also we did not study the management of patients who have received biologics through the  
47 usual health care system (i.e. without recourse to the courts) represents another limitation of  
48 the study. Thus, our study provides only indirect evidence regarding how these patients are  
49 managed within the Brazilian system".  
50  
51  
52

### 53 ***Relation to evidence and recommendations***

1  
2  
3 The guidelines we reviewed were consistent in their recommendation that patients with  
4 severe psoriasis who do not respond or have a contraindication to or are intolerant to topical  
5 therapy and systemic therapy with immunosuppressant, including cyclosporine and  
6 methotrexate, are candidates for biologic therapies [5-8 15]. The guidelines also  
7 recommended phototherapy as an alternative. Despite evidence of the cost-effectiveness of  
8 phototherapy in moderate-to-severe psoriasis [19 20], guidelines did not insist on a trial of  
9 phototherapy before treatment with biologic agents. .  
10  
11  
12  
13

14  
15 Biologic agents may be associated with serious adverse effects, including an increase in the  
16 risk of malignancies opportunistic fungal infection, and lymphoma [10-12]. A particular  
17 concern is the use of drugs over the long term. Current the data available is insufficient to  
18 draw clear and reliable conclusions about either the efficacy of long-term treatments or the  
19 frequency of adverse effects over the long term [21-23]. The majority of plaintiffs are using  
20 biologics for over a year, and more than 10% for over three years, raising another possible  
21 concern.  
22  
23  
24  
25  
26

### 27 ***Implications.***

28  
29 Biologic agents are not included in Brazilian official guideline to treat psoriasis. Therefore,  
30 access to this medication is largely from prescriptions by private practioners. Having  
31 obtained a prescription for a biologic agent, Brazilian citizen can launch legal action to have  
32 the government pay for the high cost medication. It is perhaps ironic that despite the last  
33 report of the Brazilian health assessment technology committee (Conitec) choosing to not  
34 recommend (1) the use of these biological drugs in the treatment of psoriasis primarily  
35 because of safety concerns, judicial decisions in favor of their use requires the public health  
36 system to provide funding.  
37  
38  
39  
40  
41  
42

43  
44 One could argue that it may be unreasonable to ask judges to be aware of medical guidelines,  
45 particularly those arising from other jurisdictions. A proposed solution to this problem would  
46 be to provide the court with high quality technical analyses. In this case, experts in psoriasis  
47 aware of the guidelines would provide the analyses. So far, such analyses are unavailable  
48 [24-26]. Our results emphasize the need for technical analyses to guide court decisions,  
49 ideally considering two independent opinions.  
50  
51  
52

53  
54 Irrespective of issues of whether governments should fund biologics in psoriasis at all,  
55 clinical practice and judicial decisions should be consistent with highly credible international  
56 guidelines. Our results show an important gap between clinical practice and judicial  
57  
58  
59  
60

1  
2  
3 decisions in treatments prescribed to plaintiffs demanding medicines for Psoriasis in São  
4 Paulo, Brazil and corresponding guidelines.  
5  
6

7 Explanations for inappropriate practice include inadequate training and knowledge of the  
8 physicians who prescribe the drugs[27 28]. Another possibility is that incentives from the  
9 pharmaceutical industry are influencing the prescription of biologic agents in psoriasis.  
10 Whatever the reason, our findings demonstrate that the court system is not functioning well.  
11 This is not necessarily the fault of the judges, but of a system that does not ensure that judges  
12 have the appropriate access to expert guidance. Independent review by disinterested experts  
13 would have led the court to insist on appropriate prior treatment before considering biologic  
14 agents. The health system also appears negligent in not ensuring optimal follow-up to  
15 patients who receive payment for their drugs from the government. The responsibility for  
16 informing practitioners of optimal management could rest with the pharmaceutical industry,  
17 the national dermatologic society, or the government.  
18  
19  
20  
21  
22  
23  
24

25  
26 Our results suggest changes at both the level of clinical practice and the function of the  
27 judicial system are urgently needed.  
28  
29

30 What is already known on this subject?  
31  
32

33 Guidelines specify the circumstances in which biologic agents should be used in patients with  
34 psoriasis and the monitoring such patients should undergo. The extent to which clinicians  
35 follow these guidelines in a variety of clinical situations remains uncertain.  
36  
37

38 What this study adds?  
39  
40

41 In Brazil, major discrepancies exist between the management of patients who receive funding  
42 for biologic agents from the government through lawsuits and the management guidelines  
43 recommend. The majority of patients have not had the appropriate trials of less toxic drugs,  
44 and laboratory monitoring is suboptimal in approximately 25% of patients.  
45  
46  
47

#### 48 *Acknowledgements* 49

50 The authors thanks support from FAPESP (Foundation for Research Support of the State of  
51 São Paulo) Process number 2009/0530841, at UNISO (University of Sorocaba), and  
52 pharmaceuticals Livia Marengo and Andressa Marcondes and Larissa Colombo Marcondes,  
53 Bruna Cipriano that have helped use doing part of extraction and interview of patients. We  
54 also thanks CODES SES-SP (Strategic Coordination Demands of Ministry of Health of São  
55  
56  
57  
58  
59  
60

Paulo) for the cooperation in give us the data from the database and help us to find the lawsuit papers in their files

**Contributors:** LL, IC, SBF and COC had the original idea and they developed the study protocol. GG, LL, MS and COC performed data analysis and drafted the manuscript. MS, FSDF, SBF, MCC and IC contributed to data collection. All authors contributed to the preparation of the manuscript and read and approved the final version.

**Competing interests:** none.

**Ethics approval:** this study is part of PSAR Project approved by committee for clinical research of University of Sorocaba on August 17, 2009, with protocol number 011/2009.

## REFERENCES

1. Zachariae H. Prevalence of joint disease in patients with psoriasis: implications for therapy. *Am J Clin Dermatol* 2003;**4**:441-7
2. Rapp SR, Feldman SR, Exum ML, et al. Psoriasis causes as much disability as other major medical diseases. *J Am Acad Dermatol* 1999;**41**(3 Pt 1):401-7
3. Menter A, CE. G. Current and future management of psoriasis. *Lancet* 2007;**370**:272-84
4. Smith CH, JNWN B. Psoriasis and its management. *BMJ Publishing* 2006;**333**:380-4
5. NICE. Psoriasis: the assessment and management of psoriasis. National Institute for Health and Clinical Excellence - Clinical Guidelines 2012
6. SIGN. Scottish Intercollegiate Guidelines Network . Diagnosis and management of psoriasis and psoriatic arthritis in adults. A national clinical guideline. Edinburgh (Scotland): Scottish Intercollegiate Guidelines Network (SIGN) 2010 **121**:65 p
7. Nast A, Boehncke WH, Mrowietz U, et al. S3 - Guidelines on the treatment of psoriasis vulgaris (English version). Update. *Journal der Deutschen Dermatologischen Gesellschaft = Journal of the German Society of Dermatology : JDDG* 2012;**10 Suppl 2**:S1-95 doi: 10.1111/j.1610-0387.2012.07919.x[published Online First: Epub Date]] .
8. Smith CH, Anstey AV, Barker JN, et al. British Association of Dermatologists' guidelines for biologic interventions for psoriasis 2009. *The British journal of dermatology* 2009;**161**(5):987-1019 doi: 10.1111/j.1365-2133.2009.09505.x[published Online First: Epub Date]].
9. SBD. Consenso Brasileiro de Psoríase 2012 - Guias de avaliação e tratamento Sociedade Brasileira de Dermatologia. – 2 ed. Rio de Janeiro: Sociedade Brasileira de Dermatologia. 2012
10. Dommasch ED, Abuabara K, Shin DB, et al. The risk of infection and malignancy with tumor necrosis factor antagonists in adults with psoriatic disease: a systematic review and meta-analysis of randomized controlled trials. *J Am Acad Dermatol* 2011;**64**(6):1035-50 doi: 10.1016/j.jaad.2010.09.734[published Online First: Epub Date]].
11. Bongartz T, Sutton AJ, Sweeting MJ, et al. Anti-TNF antibody therapy in rheumatoid arthritis and the risk of serious infections and malignancies: systematic review and meta-analysis of rare harmful effects in randomized controlled trials. *JAMA : the journal of the American Medical Association* 2006;**295**(19):2275-85 doi: 10.1001/jama.295.19.2275[published Online First: Epub Date]].

12. Singh JA, Wells GA, Christensen R, et al. Adverse effects of biologics: a network meta-analysis and Cochrane overview. *Cochrane database of systematic reviews* 2011(2):CD008794 doi: 10.1002/14651858.CD008794.pub2[published Online First: Epub Date]].
13. Psoriasis: the assessment and management of psoriasis. National Institute for Health and Clinical Excellence - Clinical Guidelines 2012
14. Guidelines of care for the management of psoriasis and psoriatic arthritis. Section 1. Overview of psoriasis and guidelines of care for the treatment of psoriasis with biologics. . American Academy of Dermatology 2008
15. Papp K, Gulliver W, Lynde C, et al. Canadian guidelines for the management of plaque psoriasis: overview. *Journal of cutaneous medicine and surgery* 2011;**15**(4):210-9
16. Pathirana D, Ormerod AD, Saiag P, et al. European S3-guidelines on the systemic treatment of psoriasis vulgaris. *Journal of the European Academy of Dermatology and Venereology* : JEADV 2009;**23** Suppl 2:1-70 doi: 10.1111/j.1468-3083.2009.03389.x[published Online First: Epub Date]].
17. GRUPO. IBOPE INTELIGÊNCIA. Coleta de dados. Diversos métodos para atender à sua demanda. Publicação em 28/04/2009. <http://www.ibope.com.br>. Acesso em 28 ju. 2011. 2011
18. LIPE. PESQUISAS. Dúvidas frequentes: o que é CATI ? Disponível em <http://www.lipe.com.br>. Acesso em 28 jul. 2011. 2011
19. Miller DW, Feldman SR. Cost-effectiveness of moderate-to-severe psoriasis treatment. *Expert opinion on pharmacotherapy* 2006;**7**(2):157-67 doi: 10.1517/14656566.7.2.157[published Online First: Epub Date]].
20. Pearce DJ, Thomas CG, Fleischer AB, Jr., et al. The cost of psoriasis therapies: considerations for therapy selection. *Dermatology nursing / Dermatology Nurses' Association* 2004;**16**(5):421-8, 32
21. Lucka TC, Pathirana D, Sammain A, et al. Efficacy of systemic therapies for moderate-to-severe psoriasis: a systematic review and meta-analysis of long-term treatment. *Journal of the European Academy of Dermatology and Venereology* 2012;**26**(11):1331-44 doi: 10.1111/j.1468-3083.2012.04492.x[published Online First: Epub Date]].
22. Schmitt J, Zhang Z, Wozel G, et al. Efficacy and tolerability of biologic and nonbiologic systemic treatments for moderate-to-severe psoriasis: meta-analysis of randomized controlled trials. *The British journal of dermatology* 2008;**159**(3):513-26 doi: 10.1111/j.1365-2133.2008.08732.x[published Online First: Epub Date]].
23. Naldi L, Razny B. Psoriasis (chronic plaque). *Clinical evidence* 2009;**1706**(1):1-109
24. Vieira FS, Zucchi P. Distorções causadas pelas ações judiciais à política de medicamentos no Brasil. *Revista de Saúde Pública* 2007;**41**:214-22
25. Biehl J, Amon JJ, Socal MP, et al. Between the court and the clinic: lawsuits for medicines and the right to health in Brazil. *Health Hum Rights* 2012;**14**(1):E36-52
26. Chieffi AL, Barata RB. ['Judicialization' of public health policy for distribution of medicines]. *Cad Saude Publica* 2009;**25**(8):1839-49
27. Grimshaw JM, Eccles MP, Lavis JN, et al. Knowledge translation of research findings. *Implementation science* : IS 2012;**7**:50 doi: 10.1186/1748-5908-7-50[published Online First: Epub Date]].
28. Cabana MD, Rand CS, Powe NR, et al. Why don't physicians follow clinical practice guidelines? A framework for improvement. *JAMA* 1999;**282**(15):1458-65



STROBE 2007 (v4) Statement—Checklist of items that should be included in reports of *cross-sectional studies*

| Section/Topic                | Item # | Recommendation                                                                                                                                                                       | Reported on page # |
|------------------------------|--------|--------------------------------------------------------------------------------------------------------------------------------------------------------------------------------------|--------------------|
| Title and abstract           | 1      | (a) Indicate the study's design with a commonly used term in the title or the abstract                                                                                               | 2                  |
|                              |        | (b) Provide in the abstract an informative and balanced summary of what was done and what was found                                                                                  | 2                  |
| <b>Introduction</b>          |        |                                                                                                                                                                                      |                    |
| Background/rationale         | 2      | Explain the scientific background and rationale for the investigation being reported                                                                                                 | 4                  |
| Objectives                   | 3      | State specific objectives, including any prespecified hypotheses                                                                                                                     | 4                  |
| <b>Methods</b>               |        |                                                                                                                                                                                      |                    |
| Study design                 | 4      | Present key elements of study design early in the paper                                                                                                                              | 5                  |
| Setting                      | 5      | Describe the setting, locations, and relevant dates, including periods of recruitment, exposure, follow-up, and data collection                                                      | 5                  |
| Participants                 | 6      | (a) Give the eligibility criteria, and the sources and methods of selection of participants                                                                                          | 5                  |
| Variables                    | 7      | Clearly define all outcomes, exposures, predictors, potential confounders, and effect modifiers. Give diagnostic criteria, if applicable                                             | 6                  |
| Data sources/<br>measurement | 8*     | For each variable of interest, give sources of data and details of methods of assessment (measurement). Describe comparability of assessment methods if there is more than one group | 6                  |
| Bias                         | 9      | Describe any efforts to address potential sources of bias                                                                                                                            | 6                  |
| Study size                   | 10     | Explain how the study size was arrived at                                                                                                                                            | 5                  |
| Quantitative variables       | 11     | Explain how quantitative variables were handled in the analyses. If applicable, describe which groupings were chosen and why                                                         | 6                  |
| Statistical methods          | 12     | (a) Describe all statistical methods, including those used to control for confounding                                                                                                | 6                  |
|                              |        | (b) Describe any methods used to examine subgroups and interactions                                                                                                                  |                    |
|                              |        | (c) Explain how missing data were addressed                                                                                                                                          |                    |
|                              |        | (d) If applicable, describe analytical methods taking account of sampling strategy                                                                                                   |                    |
|                              |        | (e) Describe any sensitivity analyses                                                                                                                                                |                    |
| <b>Results</b>               |        |                                                                                                                                                                                      |                    |

|                          |     |                                                                                                                                                                                                                                                                                                                                                                                                               |                   |
|--------------------------|-----|---------------------------------------------------------------------------------------------------------------------------------------------------------------------------------------------------------------------------------------------------------------------------------------------------------------------------------------------------------------------------------------------------------------|-------------------|
| Participants             | 13* | (a) Report numbers of individuals at each stage of study—eg numbers potentially eligible, examined for eligibility, confirmed eligible, included in the study, completing follow-up, and analysed<br>(b) Give reasons for non-participation at each stage<br>(c) Consider use of a flow diagram                                                                                                               | 7<br><br>FIGURE 1 |
| Descriptive data         | 14* | (a) Give characteristics of study participants (eg demographic, clinical, social) and information on exposures and potential confounders<br>(b) Indicate number of participants with missing data for each variable of interest                                                                                                                                                                               | TABLE 1, PAGE 8   |
| Outcome data             | 15* | Report numbers of outcome events or summary measures                                                                                                                                                                                                                                                                                                                                                          | 9, 10             |
| Main results             | 16  | (a) Give unadjusted estimates and, if applicable, confounder-adjusted estimates and their precision (eg, 95% confidence interval). Make clear which confounders were adjusted for and why they were included<br>(b) Report category boundaries when continuous variables were categorized<br>(c) If relevant, consider translating estimates of relative risk into absolute risk for a meaningful time period | 9, 10             |
| Other analyses           | 17  | Report other analyses done—eg analyses of subgroups and interactions, and sensitivity analyses                                                                                                                                                                                                                                                                                                                | 9, 10             |
| <b>Discussion</b>        |     |                                                                                                                                                                                                                                                                                                                                                                                                               |                   |
| Key results              | 18  | Summarise key results with reference to study objectives                                                                                                                                                                                                                                                                                                                                                      | 10                |
| Limitations              | 19  | Discuss limitations of the study, taking into account sources of potential bias or imprecision. Discuss both direction and magnitude of any potential bias                                                                                                                                                                                                                                                    | 11                |
| Interpretation           | 20  | Give a cautious overall interpretation of results considering objectives, limitations, multiplicity of analyses, results from similar studies, and other relevant evidence                                                                                                                                                                                                                                    | 11                |
| Generalisability         | 21  | Discuss the generalisability (external validity) of the study results                                                                                                                                                                                                                                                                                                                                         | 12, 13            |
| <b>Other information</b> |     |                                                                                                                                                                                                                                                                                                                                                                                                               |                   |
| Funding                  | 22  | Give the source of funding and the role of the funders for the present study and, if applicable, for the original study on which the present article is based                                                                                                                                                                                                                                                 | 14                |

\*Give information separately for cases and controls in case-control studies and, if applicable, for exposed and unexposed groups in cohort and cross-sectional studies.

**Note:** An Explanation and Elaboration article discusses each checklist item and gives methodological background and published examples of transparent reporting. The STROBE checklist is best used in conjunction with this article (freely available on the Web sites of PLoS Medicine at <http://www.plosmedicine.org/>, Annals of Internal Medicine at <http://www.annals.org/>, and Epidemiology at <http://www.epidem.com/>). Information on the STROBE Initiative is available at [www.strobe-statement.org](http://www.strobe-statement.org).

**TITLE: Adherence to guidelines in use of biological agents to treat psoriasis in Brazil**

## **AUTHORS**

### **Miriam Sanches do Nascimento Silveira, MSc**

*Pharmaceutical Sciences Post graduate Course, University of Sorocaba, UNISO, Brazil.*  
*miriam.silveira@prof.uniso.br*

### **Iara Alves de Camargo MSc**

*Pharmaceutical Sciences Post graduate Course, University of Sorocaba, UNISO, Brazil. Codes -  
Secretaria Estadual de Saúde – São Paulo*  
*iadec@uol.com.br*

### **Mayara Costa de Camargo**

*Pharmaceutical Sciences Post graduate Course, University of Sorocaba, UNISO, Brazil*  
*mah-camargo@hotmail.com*

### **Claudia Garcia Serpa Osorio-de-Castro, PhD**

*Núcleo de Assistência Farmacêutica, Escola Nacional de Saúde Pública Sérgio Arouca - Fundação  
Oswaldo Cruz – Fiocruz*  
*claudia.osorio@ensp.fiocruz.br*

### **Silvio Barberato-Filho, PhD**

*Programa de Pós-Graduação em Ciências Farmacêuticas da Universidade de Sorocaba, SP*  
*silvio.barberato@prof.uniso.br*

### **Fernando de Sá Del Fiol, PhD**

*Programa de Pós-Graduação em Ciências Farmacêuticas da Universidade de Sorocaba, SP*  
*fernando.fiol@prof.uniso.br*

### **Gordon Guyatt MD, MSc**

*Department of Clinical Epidemiology and Biostatistics, McMaster University, Canada.*  
*guyatt@mcmaster.ca*

### **Luciane Cruz Lopes, PhD**

*Pharmaceutical Sciences Post graduate Course, University of Sorocaba, UNISO, Brazil.*  
*luslopes@terra.com.br*

**Contact information for the corresponding author:** Luciane Cruz Lopes,  
*luslopes@terra.com.br*

- ✓ **Financial support:** FAPESP – Fundação de Amparo a Pesquisa - Process N. 2009/53084-1
- ✓ **No conflict of interest**
- ✓ **Word count: 2284**
- ✓ **Protocol approved ethics committee: 11/2009**
- ✓ **There is no additional data available**
- ✓ **Key words:** psoriasis, biological, guidelines, health public, policy, Brazil.

1  
2  
3 [BACKGROUND]: In São Paulo, Brazil, patients gain funding for biological agents for  
4 treatment of psoriasis through lawsuits to the government. The extent to which  
5 management of such patients adhere to authoritative guidelines is uncertain.  
6

7 [OBJECTIVE]: To determine the extent to which clinical practice adheres to authoritative  
8 guidelines in patients receiving treatment for psoriasis through lawsuits.  
9

10 [METHODS]: We identified patients through records of the State Health Secretariat of  
11 São Paulo from 2004 to 2011. We consulted guidelines from five countries and chose as  
12 standards only those recommendations that the guidelines uniformly endorsed. Pharmacy  
13 records provided data regarding biologic use. Guidelines recommended biologics agents  
14 only in patients with severe psoriasis who have failed to respond to both topical and  
15 systemic therapies (e.g. cyclosporine and methotrexate) and recommended yearly  
16 monitoring of blood counts and liver function.  
17

18 [RESULTS]: Of 218 patients identified in the database, 3 did not meet eligibility criteria  
19 and 12 declined participation. Of 203 patients interviewed, 91 were still using biological  
20 medicine; we established adherence to laboratory monitoring in these patients. In the  
21 total sample, management failed to meet standards of prior use of topical and systemic  
22 medication in 169 (83.2%) of the patients. .Of the 91 patient using biological medicine at  
23 the time of the survey, 23 (25.2%) did not undergo appropriate laboratory tests.  
24

25 [CONCLUSIONS]: Important discrepancies exist between clinical practice and the  
26 recommendations of guidelines the management of plaintiffs using biologic drugs to treat  
27 psoriasis.  
28  
29  
30  
31  
32  
33  
34  
35  
36  
37  
38  
39  
40  
41  
42  
43  
44  
45  
46  
47  
48  
49  
50  
51  
52  
53  
54  
55  
56  
57  
58  
59  
60

### **Strengths and limitations**

1. Strengths of this study include our ability to obtain a complete list of all individuals who succeeded in obtaining government payment for biologic agents for psoriasis.
2. We obtained pharmacy records of medication use and corroborating information from patient interviews.
3. Duplicate review of interview recordings ensured accurate information.
4. Possible limitations in our study include the possibility that patients memory of prior medication use may not have been accurate.
5. The interviews, however, included detailed descriptions of medications, including topical agents, and patients' failure to remember the use of topical agents may be implausible.
6. We did not obtain corroboration of reports of adverse effects or apparent improvement with the biologic agents, and these data are therefore suspect.
7. *We did not study the management of patients who have received biologics through the usual health care system*

## INTRODUCTION

Psoriasis, chronic inflammatory immune-mediated skin disease that predominantly affects the skin and joints occurs in between 1.5 to 3% of the population[1]. Onset may occur at any age but peaks in the second and third decades. The severity of psoriasis varies widely, and its course is characterized by relapses and remissions, though it usually persists throughout life. Its negative impact on health-related quality of life is similar to that of ischemic heart disease, diabetes, depression and cancer [2].

The significant reduction in quality of life and the psychosocial disability suffered by patients highlight the need for prompt, effective treatment, and long-term disease control[3 4]. In mild psoriasis, topical treatment can be effective[5]. Those with moderate to severe disease often require treatment with phototherapy and systemic treatment[6]. When systemic traditional treatment with cyclosporine, methotrexate, or acitretin fail (non-biologic systemic agents or N-BISYS), systemic biological therapies such as the tumor necrosis factor antagonists' adalimumab, etanercept and infliximab, and the monoclonal antibody ustekimumab that targets interleukin-12 (IL-12) and IL-23 become options.[6-9].

Due to their immunosuppressive activity, some anti-TNFs have been associated with a small increased risk of infection in patients with psoriasis[10], and studies of TNF antagonist use in other disease areas have raised concerns over a potential link to cardiovascular side-effects, malignancies, and neurological defects[10-12]. Guidelines uniformly recommend at least one annual patient review to check for infections, malignancies, and other adverse effects of biologics agents.

In Brazil patients can, once they are prescribed by a clinician, go to the courts to force the state to pay for expensive medication such as biologics. Court decisions may not be consistent with optimal standards of care in terms of patients who are appropriate for use of biologics. Furthermore, once patients receive biologics through court decisions, subsequent management may not be optimal.

The objective of this study was to identify standards of management of psoriasis common to major international guidelines and to evaluate the extent to which Brazilian physicians who prescribed biologics that courts approved on the basis of law suits adhered to these standards.

## METHODS

The protocol was authorized by the State Department of Health (SES-SP) and also approved by the ethics committee for clinical research of University of Sorocaba on August 17, 2009, with protocol number 011/2009.

### Choice of Guidelines and Guideline Recommendations

We consulted guidelines from the following countries: United Kingdom[13], Germany[7], Brazil,[9] United States[14], Canada[15] and European[16]. We used both national guidelines (NICE, SIGN)[5 6] and specialty society guidelines. We reviewed all recommendations in each guideline and chose as standards only those recommendations that for prior treatment were uniformly endorsed across all guidelines and for monitoring were endorsed by 4 of the 5 guidelines.

Recommendations uniformly endorsed by every guideline[5-9] specified that biologics should only be used in patients with severe psoriasis who had failed to respond to, have a contraindication to, or are intolerant of topical therapies, and at least one systemic therapy (e.g. cyclosporine or methotrexate). Guidelines also uniformly recommend at least one annual patient review to check for infections, malignancies, and other adverse effects of biologics agents and also to evaluate control of psoriasis. Guidelines specified that the review should include monitoring of complete blood cell count and liver function tests.

### Eligibility Criteria

Patients were eligible if they had, through lawsuits filed against the state of São Paulo in the period 2004-2010, gained access to biologics for treatment of psoriasis. All patients gave informed consent.

### Identification of Patients and Collection of Patient Data

In order to identify eligible patients, two researchers abstracted data from all the dispensing orders in the database for psoriasis - identified by ICD code L40 - originating from lawsuits from 2004-2010 including the name, address and telephone number, gender, age, healthcare provider, whether that provider worked in the public or private system, type of biologic dispensed, and diagnoses. We excluded patient with arthritis psoriatic.

1  
2  
3 We contacted patients with psoriasis by telephone, and if they proved eligible and agreed to  
4 participate in the study, conducted interviews. The interviews were conducted by telephone  
5 using Computer Assisted Telephonic Interviews (ITAC) technology with a microcomputer  
6 handset with headphones. This system allows recording and monitoring of the duration of  
7 the conversation [17 18]. Research staff working in pairs independently recorded data from  
8 the interviews, with discrepancies resolved by the principle investigator (LL).  
9

10  
11  
12  
13  
14 The interview schedule was developed in consultation with a local dermatologist (see  
15 **Appendix**) after consideration of the recommendations consistent across guidelines. An  
16 electronic form was developed in Microsoft Office Access based on the instrument developed  
17 for the interviews. To address the items listed in the instrument, 16 screens were designed to  
18 record the data from the interviews. Each interviewer received training on use of language  
19 related to each question in the interview schedule. *The questionnaire included the following:*  
20 *what drugs the patient was using for the treatment of psoriasis prior to the court judgment, the*  
21 *time of diagnosis of psoriasis, comorbidities and whether patients received at least annual*  
22 *review.* For patients still taking biologics we determined if they had received a medical  
23 consultation in the previous year and what tests had been undertaken in the previous year. In  
24 Brazil, patients receive records of all their laboratory tests and typically retain these records  
25 indefinitely; all patients still receiving biologics reported that they had retained records of all  
26 of laboratory tests undertaken during the previous year.  
27

28  
29  
30  
31  
32  
33  
34  
35  
36 Patients' report of the period in which they used the biologics were cross-checked with data  
37 obtained from pharmacy records and from legal records from lawsuits. Legal records from  
38 lawsuits gave us the name of patients, name of the drugs obtained through the law suit,  
39 whether the prescription came from private or public insurance, sex, diagnostic and age of  
40 patients. If we found discrepancy between the three sources of information, we considered  
41 the information from pharmacy records definitive. Thus, definitive information about the  
42 name of the biologic and the duration of use of the biologic was obtained from the pharmacy,  
43 and definitive information of the time of diagnosis, use of previous medicines, and laboratory  
44 results was obtained from the patient. We considered guideline adherence adequate when  
45 court decisions and subsequent clinical care had adhered to all recommendations from  
46 guidelines.  
47  
48  
49  
50  
51  
52  
53  
54  
55  
56  
57  
58  
59  
60



1  
2  
3 In the interviews we also asked patients about their adverse effects and whether these led to  
4 discontinuing medications and their perception of the effectiveness of the biologic agents.  
5  
6  
7

## 8 **RESULTS**

9  
10 We reviewed 25,184 lawsuits that had succeeded in obtaining medicines, dietary  
11 supplements, or other health products, such as orthotics and prosthetics, and diagnostic and  
12 therapeutic procedures in the period deposited in the Public Finance Courts Capital in period  
13 2004 to 2010. Of 218 patients identified as using biologics for psoriasis, in 3 the contact  
14 information was a law office that did not allow us to contact patients, 1 patient had died, 2  
15 had never used the biologic that was mandated by the court decision, and 9 refused the  
16 interview. We interviewed 203 patients, of whom 91 (44.8%) were still using a biologic  
17 agent (Figure 1).  
18  
19  
20  
21  
22  
23  
24  
25

26 Eligible patients received one of four biologic drugs: adalimumab, etanercept, infliximab and  
27 efalizumab. Table 1 presents the socio demographic and medical health characteristics of the  
28 203 eligible patients as well as the duration patients used the biologic agents granted payment  
29 by the courts. Over a third of the patients used the biologic agents for less than a year, and  
30 over 50% for 1 to 3 years.  
31  
32  
33  
34  
35  
36  
37  
38  
39  
40  
41  
42  
43  
44  
45  
46  
47  
48  
49  
50  
51  
52  
53  
54  
55  
56  
57  
58  
59  
60

Table 1 - Baseline characteristics of plaintiffs with psoriasis

|                                             | Patients<br>N=203 | %           |
|---------------------------------------------|-------------------|-------------|
| <b>City of residence</b>                    |                   |             |
| <i>São Paulo</i>                            | 122               | 60          |
| <i>Other</i>                                | 81                | 40          |
| <b>Health care</b>                          |                   |             |
| <i>Private</i>                              | 141               | 69.5        |
| <b>Sex</b>                                  |                   |             |
| <i>Male</i>                                 | 129               | 63.5        |
| <b>Age (years)</b>                          |                   |             |
| <i>19 - 59</i>                              | 156               | 76.9        |
| <i>≥ 60</i>                                 | 47                | 23.1        |
| <i>mean ± sd</i>                            |                   | 48.9 ± 13.7 |
| <b>Time of diagnosis (years previous)</b>   |                   |             |
| <i>6 or more</i>                            | 177               | 84.9        |
| <i>2 - 5</i>                                | 25                | 10.2        |
| <i>≤1 year</i>                              | 1                 | 0.5         |
| <b>Comorbidities</b>                        |                   |             |
| <i>None</i>                                 | 128               | 63          |
| <i>Cardiovascular disease</i>               | 26                | 12.8        |
| <i>Diabetes mellitus</i>                    | 12                | 5.9         |
| <i>Others</i>                               | 37                | 18.2        |
| <b>Duration of use of biologic (months)</b> |                   |             |
| <i>12 or less</i>                           | 69                | 34.0        |
| <i>13 to 36</i>                             | 110               | 54.2        |
| <i>37 to 72</i>                             | 24                | 11.8        |

*Sd= standard deviation*

Table 2 presents the use of non-biologic medications prior to the law suit decision to pay for the use of a biologic agent. Over 20% of the patients had not used any conventional interventions - either topical, light, or systemic agents - for psoriasis prior to launching their law suit for use of biologic agents. Topical agents were used very infrequently - in only approximately 16% of patients. Phototherapy was similarly infrequently used - in 36.9% of the patients. Approximately 71% of the patients had used non-biologic systemic therapy before their law suit. No patients had contraindications, or were using drugs with problematic interactions, that would have prevented the use of all recommended systemic agents (cyclosporine, methotrexate, and acitretin). Given that guideline adherence requires use topical and systematic therapy before beginning biologic use, only 34 patients (16.7%) met guideline requirements.

**Table 2 – Treatment prior to initiating law suit for biologic use.**

|                                                                                   | adalimumab | efalizumab | etanercept | infliximab | Total     |
|-----------------------------------------------------------------------------------|------------|------------|------------|------------|-----------|
|                                                                                   | 14 (6.9)   | 43 (21.2)  | 35 (17.2)  | 111 (54.7) | 203 (100) |
| <b>Therapies</b>                                                                  |            |            |            |            |           |
| None                                                                              | 1 (7.1)    | 12 (27.9)  | 6 (17.1)   | 25 (22.5)  | 44 (21.7) |
| Only Topical                                                                      | 0          | 0          | 0          | 0          | 0         |
| Only Phototherapy                                                                 | 0 (0.0)    | 5 (11.6)   | 3 (8.7)    | 7 (6.3)    | 15 (7.4)  |
| Only N-BIOSYS#                                                                    | 10 (71.4)  | 2 (4.6)    | 12 (34.3)  | 36 (32.4)  | 60 (29.6) |
| <b>Combination of Therapies prior use of Biologic n (%)</b>                       |            |            |            |            |           |
| Topical+ Phototherapy                                                             | 0          | 0          | 0          | 0          | 0         |
| Topical + N-BIOSYS#                                                               | 1 (7.1)    | 4 (9.3)    | 3 (8.6)    | 16(14.4 )  | 24 (11.8) |
| Phototherapy + N-BIOSYS#                                                          | 2 ( )      | 18 (41.8)  | 8 (22.8)   | 22 (19.8)  | 50 (24.6) |
| Topical+Phototherapy+N-BIOSYS#                                                    | 0 (0.0)    | 2 (4.6)    | 3 ( 8.6)   | 5 (4.5)    | 10 (4.9)  |
| <b>Recommended use of the biological agents according guidelines (7-10) n (%)</b> |            |            |            |            |           |
| Topical + N-BIOSYS                                                                | 1 (7.1)    | 6 (14.0)   | 6 (17.1)   | 21 (18.9)  | 34 (16.7) |

# acitretin, methotrexate; ciclosporine; sd – standard deviation; PSO – psoriasis

# acitretin, methotrexate; ciclosporin; sd – standard deviation; N-BIOSYS – non biologic systemic agents

Table 3 presents findings in the 91 patients who were still using a biologic agent at the time of the interview. The pattern of prior use was similar to the overall group, with 19.3% of patients having used both a topical agent and systemic therapy. All patients had visited a doctor at least once a year, but 25.2% did not undergo the recommended laboratory tests (blood count, differential count, liver function) (Table 3). Thus, only 14.2% of the patients met guideline criteria for both use of prior agents and appropriate monitoring.

Of the 203 respondents 134 (66%) perceived that they experienced important improvement with use of biologic agents, although 20 patients reported a deterioration they attributed to the biologic agents. Adverse effects severe enough to discontinue medication were reported by 23 patients (11.3%).

1  
2  
3  
4  
5  
6  
7  
8  
9  
10  
11  
12  
13  
14  
15  
16  
17  
18  
19  
20  
21  
22  
23  
24  
25  
26  
27  
28  
29  
30  
31  
32  
33  
34  
35  
36  
37  
38  
39  
40  
41  
42  
43  
44  
45  
46  
47  
48  
49  
50  
51  
52  
53  
54  
55  
56  
57  
58  
59  
60

For peer review only

**Table 3 - Clinical follow up and outcome judgment in patient with psoriasis still taking biologic agent.**

| Outcomes                                                               | adalimumab<br>9 (9.9) | etanercept<br>22 (62.9) | infliximab<br>60 (54.0) | Total<br>91(100) |
|------------------------------------------------------------------------|-----------------------|-------------------------|-------------------------|------------------|
| <b>Annual Review</b>                                                   |                       |                         |                         |                  |
| <b>A</b> <i>consults*</i>                                              | 9 (100)               | 22 (100)                | 60 (100)                | 91(100)          |
| <b>B</b> <i>laboratorial exams**</i>                                   | 7 (77.8)              | 15 (68.2)               | 46 (76.7)               | 68 (74.8)        |
| <b>Clinical monitoring adequate</b>                                    |                       |                         |                         |                  |
| <b>C</b> <i>A + B</i>                                                  | 7 (77.8)              | 15 (68.9)               | 46 (76.4)               | 68 (74.8)        |
| <b>Therapies</b>                                                       |                       |                         |                         |                  |
| <i>None</i>                                                            | 0 (0.0)               | 3 (13.6)                | 14 (23.3)               | 17 (18.7)        |
| <i>Only Topical</i>                                                    | 0 (0.0)               | 0 (0.0)                 | 0 (0.0)                 | 0 (0.0)          |
| <i>Only Phototherapy</i>                                               | 0 (0.0)               | 1 (4.5)                 | 4 (6.7)                 | 5 (5.5)          |
| <i>Only N-BIOSYS#</i>                                                  | 7 (77.8)              | 9 (40.9)                | 18 (30.0)               | 34 (37.4)        |
| <b>Combination of Therapies prior use of Biologic n (%)</b>            |                       |                         |                         |                  |
| <i>Topical + Phototherapy</i>                                          | 0 (0.0)               | 0 (0.0)                 | 0 (0.0)                 | 0 (0.0)          |
| <b>D</b> <i>Topical + N-BIOSYS#</i>                                    | 1 (11.1)              | 3 (13.6)                | 8 (13.3)                | 12 (13.2)        |
| <i>Phototherapy + N-BIOSYS#</i>                                        | 1 (11.1)              | 4 (18.2)                | 13 (21.7)               | 18 (19.8)        |
| <b>E</b> <i>Topical+Phototherapy+N-BIOSYS</i>                          | 0 (0.0)               | 2 (9.1)                 | 3 (5.0)                 | 5 (5.5)          |
| <b>F Recommended use of the biological agents according guidelines</b> |                       |                         |                         |                  |
| <b>D + E</b>                                                           | 1 (11.1)              | 5 (22.7)                | 11 (18.3)               | 17 (19.3)        |
| <b>Adherence of guideline</b>                                          |                       |                         |                         |                  |
| <i>Prior drugs and monitoring (C + D)</i>                              | 1 (11.1)              | 3 (13.6)                | 9 (15.0)                | 13 (14.2)        |

\*at least one annual medical consult; blood differential (complete blood cell count), liver function tests;  
# use of biologic agent after treatment with topic and one systemic non biologic agent;

## DISCUSSION

### Main Findings

The key finding of this investigation is that very few patients obtaining payment for use of biologic agents for treatment of psoriasis had met guideline criteria for use of non-biologic therapy prior to commencing expensive and potentially toxic biologic agents (Tables 2 and 3). In particular, topical agents had seldom been used in these patients. In addition, approximately 30% had not used any non-biologic systemic agents. Further, of those still using biologic agents approximately 25% had not undergone the recommended laboratory investigations in the prior year. Thus, complete adherence to guideline recommendations for prior therapy occurred in only 16.7% of patients and complete guideline adherence including prior therapy and laboratory monitoring in only 14.2% of those still using biologic agents (Tables 2 and 3).

1  
2  
3 The patients in this sample did not have heart failure, the only universally agreed upon any  
4 contraindication to the use of immunosuppressive drugs (~~alcohol, pleural effusion,~~  
5 ~~coagulopathy, uncontrolled infection, liver disease, ascites or pregnancy~~) (Table 1).  
6  
7

8 However, the prevalent comorbidities detected in these patients involve the cardiovascular  
9 system, the main contraindication to the use of biological drugs (22). Thus, the pattern of  
10 comorbidity raises further concern regarding the use of biologic agents without, in  
11 approximately 30%, the prior use of non-biologic immunosuppressant therapy.  
12  
13

#### 14 ***Strengths and weaknesses of the study***

15  
16 Strengths of this study include our ability to obtain a complete list of all individuals who  
17 succeeded in obtaining government payment for biologic agents for psoriasis. We were able  
18 to contact and obtain consent from 203 or 218 potentially eligible patients. We obtained  
19 pharmacy records of medication use and corroborating information from patient interviews.  
20 Duplicate review of interview recordings ensured accurate information. We surveyed a  
21 number of key guidelines including both public agencies and specialty societies from a  
22 number of countries and used as criteria only recommendations included in all the guidelines.  
23  
24

25  
26 Possible limitations in our study include the possibility that patient's memory of prior  
27 medication use may not have been accurate. In particular, approximately 20% of patients  
28 reported no prior topical, phototherapy, or system therapy prior to use of biologic agents. The  
29 interviews, however, included detailed descriptions of medications, including topical agents,  
30 and patients' failure to remember the use of topical agents may be implausible. We did not  
31 obtain corroboration of reports of adverse effects or apparent improvement with the biologic  
32 agents, and these data are therefore suspect.  
33  
34

35  
36 Also we did not study the management of patients who have received biologics through the  
37 usual health care system (i.e. without recourse to the courts) represents another limitation of  
38 the study. Thus, our study provides only indirect evidence regarding how these patients are  
39 managed within the Brazilian system".  
40  
41

#### 42 ***Relation to evidence and recommendations***

43  
44 The guidelines we reviewed were consistent in their recommendation that patients with  
45 severe psoriasis who do not respond or have a contraindication to or are intolerant to topical  
46 therapy and systemic therapy with immunosuppressant, including cyclosporine and  
47  
48  
49  
50  
51  
52  
53  
54  
55  
56  
57  
58  
59  
60

1  
2  
3 methotrexate, are candidates for biologic therapies [5-8 15]. The guidelines also  
4 recommended phototherapy as an alternative. Despite evidence of the cost-effectiveness of  
5 phototherapy in moderate-to-severe psoriasis [19 20], guidelines did not insist on a trial of  
6 phototherapy before treatment with biologic agents. .  
7  
8

9  
10 Biologic agents may be associated with serious adverse effects, including an increase in the  
11 risk of malignancies opportunistic fungal infection, and lymphoma [10-12]. A particular  
12 concern is the use of drugs over the long term. Current the data available is insufficient to  
13 draw clear and reliable conclusions about either the efficacy of long-term treatments or the  
14 frequency of adverse effects over the long term [21-23]. The majority of plaintiffs are using  
15 biologics for over a year, and more than 10% for over three years, raising another possible  
16 concern.  
17  
18

### 21 ***Implications.***

22  
23 Biologic agents are not included in Brazilian official guideline to treat psoriasis. Therefore,  
24 access to this medication is largely from prescriptions by private practioners. Having  
25 obtained a prescription for a biologic agent, Brazilian citizen can launch legal action to have  
26 the government pay for the high cost medication. It is perhaps ironic that despite the last  
27 report of the Brazilian health assessment technology committee (Conitec) choosing to not  
28 recommend (1) the use of these biological drugs in the treatment of psoriasis primarily  
29 because of safety concerns, judicial decisions in favor of their use requires the public health  
30 system to provide funding.  
31  
32

33  
34 *One could argue that it may be unreasonable to ask judges to be aware of medical*  
35 *guidelines, particularly those arising from other jurisdictions. A proposed solution to this*  
36 *problem would be to provide the court with high quality technical analyses. In this case,*  
37 *experts in psoriasis aware of the guidelines would provide the analyses. So far, such*  
38 *analyses are unavailable [24-26]. Our results emphasize the need for technical analyses to*  
39 *guide court decisions, ideally considering two independent opinions.*  
40  
41

42  
43 Irrespective of issues of whether governments should fund biologics in psoriasis at all,  
44 clinical practice and judicial decisions should be consistent with highly credible international  
45 guidelines. Our results show an important gap between clinical practice and judicial  
46 decisions in treatments prescribed to plaintiffs demanding medicines for Psoriasis in São  
47 Paulo, Brazil and corresponding guidelines.  
48  
49  
50  
51  
52  
53  
54  
55  
56  
57  
58  
59  
60

1  
2  
3 *Explanations for inappropriate practice include inadequate training and knowledge of the*  
4 *physicians who prescribe the drugs[27 28]. Another possibility is that incentives from the*  
5 *pharmaceutical industry are influencing the prescription of biologic agents in psoriasis.*  
6 *Whatever the reason, our findings demonstrate that the court system is not functioning well.*  
7 *This is not necessarily the fault of the judges, but of a system that does not ensure that*  
8 *judges have the appropriate access to expert guidance. Independent review by disinterested*  
9 *experts would have led the court to insist on appropriate prior treatment before considering*  
10 *biologic agents. The health system also appears negligent in not ensuring optimal follow-up*  
11 *to patients who receive payment for their drugs from the government. The responsibility for*  
12 *informing practitioners of optimal management could rest with the pharmaceutical industry,*  
13 *the national dermatologic society, or the government.*  
14  
15  
16  
17  
18  
19  
20  
21  
22

23 Our results suggest changes at both the level of clinical practice and the function of the  
24 judicial system are urgently needed.  
25

26  
27 What is already known on this subject?  
28

29 Guidelines specify the circumstances in which biologic agents should be used in patients with  
30 psoriasis and the monitoring such patients should undergo. The extent to which clinicians  
31 follow these guidelines in a variety of clinical situations remains uncertain.  
32  
33

34  
35  
36 What this study adds?  
37

38 In Brazil, major discrepancies exist between the management of patients who receive funding  
39 for biologic agents from the government through lawsuits and the management guidelines  
40 recommend. The majority of patients have not had the appropriate trials of less toxic drugs,  
41 and laboratory monitoring is suboptimal in approximately 25% of patients.  
42  
43  
44  
45

#### 46 *Acknowledgements*

47  
48 The authors thanks support from FAPESP (Foundation for Research Support of the State of  
49 São Paulo) Process number 2009/0530841, at UNISO (University of Sorocaba), and  
50 pharmaceuticals Livia Marengo and Andressa Marcondes and Larissa Colombo Marcondes,  
51 Bruna Cipriano that have helped use doing part of extraction and interview of patients. We  
52 also thanks CODES SES-SP (Strategic Coordination Demands of Ministry of Health of São  
53  
54  
55  
56  
57  
58  
59  
60



Paulo) for the cooperation in give us the data from the database and help us to find the lawsuit papers in their files

**Contributors:** LL, IC, SBF and COC had the original idea and they developed the study protocol. GG, LL, MS and COC performed data analysis and drafted the manuscript. MS, FSDF, SBF, MCC and IC contributed to data collection. All authors contributed to the preparation of the manuscript and read and approved the final version.

**Competing interests:** none.

**Ethics approval:** this study is part of PSAR Project approved by committee for clinical research of University of Sorocaba on August 17, 2009, with protocol number 011/2009.

## REFERENCES

1. Zachariae H. Prevalence of joint disease in patients with psoriasis: implications for therapy. *Am J Clin Dermatol* 2003;**4**:441-7
2. Rapp SR, Feldman SR, Exum ML, et al. Psoriasis causes as much disability as other major medical diseases. *J Am Acad Dermatol* 1999;**41**(3 Pt 1):401-7
3. Menter A, CE. G. Current and future management of psoriasis. *Lancet* 2007;**370**:272-84
4. Smith CH, JNWN B. Psoriasis and its management. *BMJ Publishing* 2006;**333**:380-4
5. NICE. Psoriasis: the assessment and management of psoriasis. National Institute for Health and Clinical Excellence - Clinical Guidelines 2012
6. SIGN. Scottish Intercollegiate Guidelines Network . Diagnosis and management of psoriasis and psoriatic arthritis in adults. A national clinical guideline. Edinburgh (Scotland): Scottish Intercollegiate Guidelines Network (SIGN) 2010 **121**:65 p
7. Nast A, Boehncke WH, Mrowietz U, et al. S3 - Guidelines on the treatment of psoriasis vulgaris (English version). Update. *Journal der Deutschen Dermatologischen Gesellschaft = Journal of the German Society of Dermatology : JDDG* 2012;**10 Suppl 2**:S1-95 doi: 10.1111/j.1610-0387.2012.07919.x[published Online First: Epub Date]] .
8. Smith CH, Anstey AV, Barker JN, et al. British Association of Dermatologists' guidelines for biologic interventions for psoriasis 2009. *The British journal of dermatology* 2009;**161**(5):987-1019 doi: 10.1111/j.1365-2133.2009.09505.x[published Online First: Epub Date]] .
9. SBD. Consenso Brasileiro de Psoríase 2012 - Guias de avaliação e tratamento Sociedade Brasileira de Dermatologia. – 2 ed. Rio de Janeiro: Sociedade Brasileira de Dermatologia. 2012
10. Dommasch ED, Abuabara K, Shin DB, et al. The risk of infection and malignancy with tumor necrosis factor antagonists in adults with psoriatic disease: a systematic review and meta-analysis of randomized controlled trials. *J Am Acad Dermatol* 2011;**64**(6):1035-50 doi: 10.1016/j.jaad.2010.09.734[published Online First: Epub Date]] .
11. Bongartz T, Sutton AJ, Sweeting MJ, et al. Anti-TNF antibody therapy in rheumatoid arthritis and the risk of serious infections and malignancies: systematic review and meta-analysis of rare harmful effects in randomized controlled trials. *JAMA : the journal of the American Medical Association* 2006;**295**(19):2275-85 doi: 10.1001/jama.295.19.2275[published Online First: Epub Date]] .
12. Singh JA, Wells GA, Christensen R, et al. Adverse effects of biologics: a network meta-analysis and Cochrane overview. *Cochrane database of systematic reviews* 2011(2):CD008794 doi: 10.1002/14651858.CD008794.pub2[published Online First: Epub Date]] .

13. Psoriasis: the assessment and management of psoriasis. National Institute for Health and Clinical Excellence - Clinical Guidelines 2012
14. Guidelines of care for the management of psoriasis and psoriatic arthritis. Section 1. Overview of psoriasis and guidelines of care for the treatment of psoriasis with biologics. . American Academy of Dermatology 2008
15. Papp K, Gulliver W, Lynde C, et al. Canadian guidelines for the management of plaque psoriasis: overview. *Journal of cutaneous medicine and surgery* 2011;**15**(4):210-9
16. Pathirana D, Ormerod AD, Saiag P, et al. European S3-guidelines on the systemic treatment of psoriasis vulgaris. *Journal of the European Academy of Dermatology and Venereology* : JEADV 2009;**23** Suppl 2:1-70 doi: 10.1111/j.1468-3083.2009.03389.x[published Online First: Epub Date]].
17. GRUPO. IBOPE INTELIGÊNCIA. Coleta de dados. Diversos métodos para atender à sua demanda. Publicação em 28/04/2009. <http://www.ibope.com.br>. Acesso em 28 ju. 2011. 2011
18. LIPE. PESQUISAS. Dúvidas frequentes: o que é CATI ? Disponível em <http://www.lipe.com.br>. Acesso em 28 jul. 2011. 2011
19. Miller DW, Feldman SR. Cost-effectiveness of moderate-to-severe psoriasis treatment. Expert opinion on pharmacotherapy 2006;**7**(2):157-67 doi: 10.1517/14656566.7.2.157[published Online First: Epub Date]].
20. Pearce DJ, Thomas CG, Fleischer AB, Jr., et al. The cost of psoriasis therapies: considerations for therapy selection. *Dermatology nursing / Dermatology Nurses' Association* 2004;**16**(5):421-8, 32
21. Lucka TC, Pathirana D, Sammain A, et al. Efficacy of systemic therapies for moderate-to-severe psoriasis: a systematic review and meta-analysis of long-term treatment. *Journal of the European Academy of Dermatology and Venereology* 2012;**26**(11):1331-44 doi: 10.1111/j.1468-3083.2012.04492.x[published Online First: Epub Date]].
22. Schmitt J, Zhang Z, Wozel G, et al. Efficacy and tolerability of biologic and nonbiologic systemic treatments for moderate-to-severe psoriasis: meta-analysis of randomized controlled trials. *The British journal of dermatology* 2008;**159**(3):513-26 doi: 10.1111/j.1365-2133.2008.08732.x[published Online First: Epub Date]].
23. Naldi L, Razny B. Psoriasis (chronic plaque). *Clinical evidence* 2009;**1706**(1):1-109
24. Vieira FS, Zucchi P. Distorções causadas pelas ações judiciais à política de medicamentos no Brasil. *Revista de Saúde Pública* 2007;**41**:214-22
25. Biehl J, Amon JJ, Socal MP, et al. Between the court and the clinic: lawsuits for medicines and the right to health in Brazil. *Health Hum Rights* 2012;**14**(1):E36-52
26. Chieffi AL, Barata RB. ['Judicialization' of public health policy for distribution of medicines]. *Cad Saude Publica* 2009;**25**(8):1839-49
27. Grimshaw JM, Eccles MP, Lavis JN, et al. Knowledge translation of research findings. *Implementation science* : IS 2012;**7**:50 doi: 10.1186/1748-5908-7-50[published Online First: Epub Date]].
28. Cabana MD, Rand CS, Powe NR, et al. Why don't physicians follow clinical practice guidelines? A framework for improvement. *JAMA* 1999;**282**(15):1458-65



## Adherence to guidelines in use of biological agents to treat psoriasis in Brazil

|                                                                                                                                                                                    |                                                                                                                                                                                                                                                                                                                                                                                                                                                                                      |
|------------------------------------------------------------------------------------------------------------------------------------------------------------------------------------|--------------------------------------------------------------------------------------------------------------------------------------------------------------------------------------------------------------------------------------------------------------------------------------------------------------------------------------------------------------------------------------------------------------------------------------------------------------------------------------|
| Journal:                                                                                                                                                                           | <i>BMJ Open</i>                                                                                                                                                                                                                                                                                                                                                                                                                                                                      |
| Manuscript ID:                                                                                                                                                                     | bmjopen-2013-004179.R2                                                                                                                                                                                                                                                                                                                                                                                                                                                               |
| Article Type:                                                                                                                                                                      | Research                                                                                                                                                                                                                                                                                                                                                                                                                                                                             |
| Date Submitted by the Author:                                                                                                                                                      | 22-Jan-2014                                                                                                                                                                                                                                                                                                                                                                                                                                                                          |
| Complete List of Authors:                                                                                                                                                          | Silveira, Miriam; UNISO, Pharmaceutical Science de Camargo, Iara; UNISO, Pharmaceutical Science Osorio-de-Castro, Claudia; FIOCRUZ, ENSP - Núcleo de Assistência Farmacêutica Barberato-Filho, Silvio; UNISO, Pharmaceutical Science Del Fiol, Fernando; UNISO, Pharmaceutical Science Guyatt, Gordon; McMaster University, Clinical Epidemiology and Biostatistics de Camargo, MaYARA; UNISO, Pharmaceutical Sciences Post graduate Course Lopes, Luciane; UNISO, Pharmacie Science |
| <b>Primary Subject Heading</b>:                                                                                                                                                    | Public health                                                                                                                                                                                                                                                                                                                                                                                                                                                                        |
| Secondary Subject Heading:                                                                                                                                                         | Evidence based practice, Dermatology, Medical education and training, Pharmacology and therapeutics, Public health                                                                                                                                                                                                                                                                                                                                                                   |
| Keywords:                                                                                                                                                                          | CLINICAL PHARMACOLOGY, Psoriasis < DERMATOLOGY, Health policy < HEALTH SERVICES ADMINISTRATION & MANAGEMENT, Protocols & guidelines < HEALTH SERVICES ADMINISTRATION & MANAGEMENT                                                                                                                                                                                                                                                                                                    |
| <p>Note: The following files were submitted by the author for peer review, but cannot be converted to PDF. You must view these files (e.g. movies) online.</p> <p>Figure 1.emf</p> |                                                                                                                                                                                                                                                                                                                                                                                                                                                                                      |

SCHOLARONE™  
Manuscripts

1  
2  
3  
4  
5  
6  
7  
8  
9  
10  
11  
12  
13  
14  
15  
16  
17  
18  
19  
20  
21  
22  
23  
24  
25  
26  
27  
28  
29  
30  
31  
32  
33  
34  
35  
36  
37  
38  
39  
40  
41  
42  
43  
44  
45  
46  
47  
48  
49  
50  
51  
52  
53  
54  
55  
56  
57  
58  
59  
60

**TITLE: Adherence to guidelines in use of biological agents to treat psoriasis in Brazil**

**AUTHORS**

**Miriam Sanches do Nascimento Silveira, MSc**

*Pharmaceutical Sciences Post graduate Course, University of Sorocaba, UNISO, Brazil.*  
*miriam.silveira@prof.uniso.br*

**Iara Alves de Camargo MSc**

*Pharmaceutical Sciences Post graduate Course, University of Sorocaba, UNISO, Brazil. Codes -  
Secretaria Estadual de Saúde – São Paulo*  
*iadec@uol.com.br*

**Claudia Garcia Serpa Osorio-de-Castro, PhD**

*Núcleo de Assistência Farmacêutica, Escola Nacional de Saúde Pública Sérgio Arouca - Fundação  
Oswaldo Cruz – Fiocruz*  
*claudia.osorio@ensp.fiocruz.br*

**Silvio Barberato-Filho, PhD**

*Programa de Pós-Graduação em Ciências Farmacêuticas da Universidade de Sorocaba, SP*  
*silvio.barberato@prof.uniso.br*

**Fernando de Sá Del Fiol, PhD**

*Programa de Pós-Graduação em Ciências Farmacêuticas da Universidade de Sorocaba, SP*  
*fernando.fiol@prof.uniso.br*

**Gordon Guyatt, PhD**

*McMaster University - Clinical Epidemiology and Biostatistics, Hamilton, Ontario  
Canada*

**Mayara Costa de Camargo**

*Pharmaceutical Sciences Post graduate Course, University of Sorocaba, UNISO, Brazil*  
*mah-camargo@hotmail.com*

**Luciane Cruz Lopes, PhD**

*Pharmaceutical Sciences Post graduate Course, University of Sorocaba, UNISO, Brazil.*  
*luslopes@terra.com.br*

**Contact information for the corresponding author:** Luciane Cruz Lopes,  
[luslopes@terra.com.br](mailto:luslopes@terra.com.br)

- ✓ **Word count: 2284**
- ✓ **Protocol approved ethics committee: 11/2009**
- ✓ **There is no additional data available**
- ✓ **Key words:** psoriasis, biological, guidelines, health public, policy, Brazil.

For peer review only

✓ **TITLE: Adherence to guidelines in use of biological agents to treat psoriasis in Brazil**

**ABSTRACT**

[BACKGROUND]: In São Paulo, Brazil, patients gain funding for biological agents for treatment of psoriasis through lawsuits to the government. The extent to which management of such patients adhere to authoritative guidelines is uncertain.

[OBJECTIVE]: To determine the extent to which clinical practice adheres to authoritative guidelines in patients receiving treatment for psoriasis through lawsuits.

[METHODS]: We identified patients through records of the State Health Secretariat of São Paulo from 2004 to 2011. We consulted guidelines from five countries and chose as standards only those recommendations that the guidelines uniformly endorsed. Pharmacy records provided data regarding biologic use. Guidelines recommended biologics agents only in patients with severe psoriasis who have failed to respond to both topical and systemic therapies (e.g. cyclosporine and methotrexate) and recommended yearly monitoring of blood counts and liver function.

[RESULTS]: Of 218 patients identified in the database, 3 did not meet eligibility criteria and 12 declined participation. Of 203 patients interviewed, 91 were still using biological medicine; we established adherence to laboratory monitoring in these patients. In the total sample, management failed to meet standards of prior use of topical and systemic medication in 169 (83.2%) of the patients. .Of the 91 patient using biological medicine at the time of the survey, 23 (25.2%) did not undergo appropriate laboratory tests.

[CONCLUSIONS]: Important discrepancies exist between clinical practice and the recommendations of guidelines the management of plaintiffs using biologic drugs to treat psoriasis.

**Strengths and limitations**

1. Strengths of this study include our ability to obtain a complete list of all individuals who succeeded in obtaining government payment for biologic agents for psoriasis.
2. We obtained pharmacy records of medication use and corroborating information from patient interviews.
3. Duplicate review of interview recordings ensured accurate information.
4. Possible limitations in our study include the possibility that patients memory of prior medication use may not have been accurate.
5. The interviews, however, included detailed descriptions of medications, including topical agents, and patients' failure to remember the use of topical agents may be implausible.
6. We did not obtain corroboration of reports of adverse effects or apparent improvement with the biologic agents, and these data are therefore suspect.
7. We did not study the management of patients who have received biologics through the usual health care system.

## INTRODUCTION

Psoriasis, chronic inflammatory immune-mediated skin disease that predominantly affects the skin and joints occurs in between 1.5 to 3% of the population[1]. Onset may occur at any age but peaks in the second and third decades. The severity of psoriasis varies widely, and its course is characterized by relapses and remissions, though it usually persists throughout life. Its negative impact on health-related quality of life is similar to that of ischemic heart disease, diabetes, depression and cancer [2].

The significant reduction in quality of life and the psychosocial disability suffered by patients highlight the need for prompt, effective treatment, and long-term disease control[3 4]. In mild psoriasis, topical treatment can be effective[5]. Those with moderate to severe disease often require treatment with phototherapy and systemic treatment[6]. When systemic traditional treatment with cyclosporine, methotrexate, or acitretin fail (non-biologic systemic agents or N-BISYS), systemic biological therapies such as the tumor necrosis factor antagonists' adalimumab, etanercept and infliximab, and the monoclonal antibody ustekimumab that targets interleukin-12 (IL-12) and IL-23 become options.[6-9].

Due to their immunosuppressive activity, some anti-TNFs have been associated with a small increased risk of infection in patients with psoriasis[10], and studies of TNF antagonist use in other disease areas have raised concerns over a potential link to cardiovascular side-effects, malignancies, and neurological defects[10-12]. Guidelines uniformly recommend at least one annual patient review to check for infections, malignancies, and other adverse effects of biologics agents.

In Brazil patients can, once they are prescribed by a clinician, go to the courts to force the state to pay for expensive medication such as biologics. Court decisions may not be consistent with optimal standards of care in terms of patients who are appropriate for use of biologics. Furthermore, once patients receive biologics through court decisions, subsequent management may not be optimal.

The objective of this study was to identify standards of management of psoriasis common to major international guidelines and to evaluate the extent to which Brazilian physicians who prescribed biologics that courts approved on the basis of law suits adhered to these standards.



## METHODS

The protocol (cross-sectional design) was authorized by the State Department of Health (SES-SP) and also approved by the ethics committee for clinical research of University of Sorocaba on August 17, 2009, with protocol number 011/2009.

### Choice of Guidelines and Guideline Recommendations

We consulted guidelines from the following countries: United Kingdom[13], Germany[7], Brazil,[9] United States[14], Canada[15] and European[16]. We used both national guidelines (NICE, SIGN)[5 6] and specialty society guidelines. We reviewed all recommendations in each guideline and chose as standards only those recommendations that for prior treatment were uniformly endorsed across all guidelines and for monitoring were endorsed by 4 of the 5 guidelines.

Recommendations uniformly endorsed by every guideline[5-9] specified that biologics should only be used in patients with severe psoriasis who had failed to respond to, have a contraindication to, or are intolerant of topical therapies, and at least one systemic therapy (e.g. cyclosporine or methotrexate). Guidelines also uniformly recommend at least one annual patient review to check for infections, malignancies, and other adverse effects of biologics agents and also to evaluate control of psoriasis. Guidelines specified that the review should include monitoring of complete blood cell count and liver function tests.

### Eligibility Criteria

Patients were eligible if they had, through lawsuits filed against the state of São Paulo in the period 2004-2010, gained access to biologics for treatment of psoriasis. All patients gave informed consent.

### Identification of Patients and Collection of Patient Data

In order to identify eligible patients, two researchers abstracted data from all the dispensing orders in the database for psoriasis - identified by ICD code L40 - originating from lawsuits from 2004-2010 including the name, address and telephone number, gender, age, healthcare provider, whether that provider worked in the public or private system, type of biologic dispensed, and diagnoses. We excluded patient with arthritis psoriatic.

1  
2  
3 We contacted patients with psoriasis by telephone, and if they proved eligible and agreed to  
4 participate in the study, conducted interviews. The interviews were conducted by telephone  
5 using Computer Assisted Telephonic Interviews (ITAC) technology with a microcomputer  
6 handset with headphones. This system allows recording and monitoring of the duration of  
7 the conversation [17 18]. Research staff working in pairs independently recorded data from  
8 the interviews, with discrepancies resolved by the principle investigator (LL).  
9  
10  
11  
12

13  
14 The interview schedule was developed in consultation with a local dermatologist (see  
15 **Appendix**) after consideration of the recommendations consistent across guidelines. An  
16 electronic form was developed in Microsoft Office Access based on the instrument developed  
17 for the interviews. To address the items listed in the instrument, 16 screens were designed to  
18 record the data from the interviews. Each interviewer received training on use of language  
19 related to each question in the interview schedule. The questionnaire included the following:  
20 what drugs the patient was using for the treatment of psoriasis prior to the court judgment, the  
21 time of diagnosis of psoriasis, comorbidities and whether patients received at least annual  
22 review. For patients still taking biologics we determined if they had received a medical  
23 consultation in the previous year and what tests had been undertaken in the previous year. In  
24 Brazil, patients receive records of all their laboratory tests and typically retain these records  
25 indefinitely; all patients still receiving biologics reported that they had retained records of all  
26 of laboratory tests undertaken during the previous year.  
27  
28  
29  
30  
31  
32  
33  
34  
35

36 Patients' report of the period in which they used the biologics were cross-checked with data  
37 obtained from pharmacy records and from legal records from lawsuits. Legal records from  
38 lawsuits gave us the name of patients, name of the drugs obtained through the law suit,  
39 whether the prescription came from private or public insurance, sex, diagnostic and age of  
40 patients. If we found discrepancy between the three sources of information, we considered  
41 the information from pharmacy records definitive. Thus, definitive information about the  
42 name of the biologic and the duration of use of the biologic was obtained from the pharmacy,  
43 and definitive information of the time of diagnosis, use of previous medicines, and laboratory  
44 results was obtained from the patient. We considered guideline adherence adequate when  
45 court decisions and subsequent clinical care had adhered to all recommendations from  
46 guidelines.  
47  
48  
49  
50  
51  
52  
53  
54  
55  
56  
57  
58  
59  
60

1  
2  
3 In the interviews we also asked patients about their adverse effects and whether these led to  
4 discontinuing medications and their perception of the effectiveness of the biologic agents.  
5  
6  
7

## 8 **RESULTS**

9  
10 We reviewed 25,184 lawsuits that had succeeded in obtaining medicines, dietary  
11 supplements, or other health products, such as orthotics and prosthetics, and diagnostic and  
12 therapeutic procedures in the period deposited in the Public Finance Courts Capital in period  
13 2004 to 2010. Of 218 patients identified as using biologics for psoriasis, in 3 the contact  
14 information was a law office that did not allow us to contact patients, 1 patient had died, 2  
15 had never used the biologic that was mandated by the court decision, and 9 refused the  
16 interview. We interviewed 203 patients, of whom 91 (44.8%) were still using a biologic  
17 agent (Figure 1).  
18  
19  
20  
21  
22  
23  
24  
25

26 Eligible patients received one of four biologic drugs: adalimumab, etanercept, infliximab and  
27 efalizumab. Table 1 presents the socio demographic and medical health characteristics of the  
28 203 eligible patients as well as the duration patients used the biologic agents granted payment  
29 by the courts. Over a third of the patients used the biologic agents for less than a year, and  
30 over 50% for 1 to 3 years.  
31  
32  
33  
34  
35  
36  
37  
38  
39  
40  
41  
42  
43  
44  
45  
46  
47  
48  
49  
50  
51  
52  
53  
54  
55  
56  
57  
58  
59  
60

Table 1 - Baseline characteristics of plaintiffs with psoriasis

|                                             | Patients<br>N=203 | %           |
|---------------------------------------------|-------------------|-------------|
| <b>City of residence</b>                    |                   |             |
| <i>São Paulo</i>                            | 122               | 60          |
| <i>Other</i>                                | 81                | 40          |
| <b>Health care</b>                          |                   |             |
| <i>Private</i>                              | 141               | 69.5        |
| <b>Sex</b>                                  |                   |             |
| <i>Male</i>                                 | 129               | 63.5        |
| <b>Age (years)</b>                          |                   |             |
| <i>19 - 59</i>                              | 156               | 76.9        |
| <i>≥ 60</i>                                 | 47                | 23.1        |
| <i>mean ± sd</i>                            |                   | 48.9 ± 13.7 |
| <b>Time of diagnosis (years previous)</b>   |                   |             |
| <i>6 or more</i>                            | 177               | 84.9        |
| <i>2 - 5</i>                                | 25                | 10.2        |
| <i>≤1 year</i>                              | 1                 | 0.5         |
| <b>Comorbidities</b>                        |                   |             |
| <i>None</i>                                 | 128               | 63          |
| <i>Cardiovascular disease</i>               | 26                | 12.8        |
| <i>Diabetes mellitus</i>                    | 12                | 5.9         |
| <i>Others</i>                               | 37                | 18.2        |
| <b>Duration of use of biologic (months)</b> |                   |             |
| <i>12 or less</i>                           | 69                | 34.0        |
| <i>13 to 36</i>                             | 110               | 54.2        |
| <i>37 to 72</i>                             | 24                | 11.8        |

*Sd= standard deviation*

Table 2 presents the use of non-biologic medications prior to the law suit decision to pay for the use of a biologic agent. Over 20% of the patients had not used any conventional interventions - either topical, light, or systemic agents - for psoriasis prior to launching their law suit for use of biologic agents. Topical agents were used very infrequently - in only approximately 16% of patients. Phototherapy was similarly infrequently used - in 36.9% of the patients. Approximately 71% of the patients had used non-biologic systemic therapy before their law suit. No patients had contraindications, or were using drugs with problematic interactions, that would have prevented the use of all recommended systemic agents (cyclosporine, methotrexate, and acitretin). Given that guideline adherence requires use topical and systematic therapy before beginning biologic use, only 34 patients (16.7%) met guideline requirements.

**Table 2 – Treatment prior to initiating law suit for biologic use.**

|                                                                                   | <b>adalimumab</b> | <b>efalizumab</b> | <b>etanercept</b> | <b>infliximab</b> | <b>Total</b>     |
|-----------------------------------------------------------------------------------|-------------------|-------------------|-------------------|-------------------|------------------|
|                                                                                   | <b>14 (6.9)</b>   | <b>43 (21.2)</b>  | <b>35 (17.2)</b>  | <b>111 (54.7)</b> | <b>203 (100)</b> |
| <b>Therapies</b>                                                                  |                   |                   |                   |                   |                  |
| <i>None</i>                                                                       | 1 (7.1)           | 12 (27.9)         | 6 (17.1)          | 25 (22.5)         | 44 (21.7)        |
| <i>Only Topical</i>                                                               | 0                 | 0                 | 0                 | 0                 | 0                |
| <i>Only Phototherapy</i>                                                          | 0 (0.0)           | 5 (11.6)          | 3 (8.7)           | 7 (6.3)           | 15 (7.4)         |
| <i>Only N-BIOSYS#</i>                                                             | 10 (71.4)         | 2 (4.6)           | 12 (34.3)         | 36 (32.4)         | 60 (29.6)        |
| <b>Combination of Therapies prior use of Biologic n (%)</b>                       |                   |                   |                   |                   |                  |
| <i>Topical+ Phototherapy</i>                                                      | 0                 | 0                 | 0                 | 0                 | 0                |
| <i>Topical + N-BIOSYS#</i>                                                        | 1 (7.1)           | 4 (9.3)           | 3 (8.6)           | 16(14.4 )         | 24 (11.8)        |
| <i>Phototherapy + N-BIOSYS#</i>                                                   | 2 ( )             | 18 (41.8)         | 8 (22.8)          | 22 (19.8)         | 50 (24.6)        |
| <i>Topical+Phototherapy+N-BIOSYS#</i>                                             | 0 (0.0)           | 2 (4.6)           | 3 ( 8.6)          | 5 (4.5)           | 10 (4.9)         |
| <b>Recommended use of the biological agents according guidelines (7-10) n (%)</b> |                   |                   |                   |                   |                  |
| <i>Topical + N-BIOSYS</i>                                                         | 1 (7.1)           | 6 (14.0)          | 6 (17.1)          | 21 (18.9)         | 34 (16.7)        |

# acitretin, methotrexate; ciclosporine; sd – standard deviation; PSO – psoriasis

# acitretin, methotrexate; ciclosporin; sd – standard deviation; N-BIOSYS – non biologic systemic agents

Table 3 presents findings in the 91 patients who were still using a biologic agent at the time of the interview. The pattern of prior use was similar to the overall group, with 19.3% of patients having used both a topical agent and systemic therapy. All patients had visited a doctor at least once a year, but 25.2% did not undergo the recommended laboratory tests (blood count, differential count, liver function) (Table 3). Thus, only 14.2% of the patients met guideline criteria for both use of prior agents and appropriate monitoring.

Of the 203 respondents 134 (66%) perceived that they experienced important improvement with use of biologic agents, although 20 patients reported a deterioration they attributed to the biologic agents. Adverse effects severe enough to discontinue medication were reported by 23 patients (11.3%).

**Table 3 - Clinical follow up and outcome judgment in patient with psoriasis still taking biologic agent.**

| Outcomes                                                               | adalimumab<br>9 (9.9) | etanercept<br>22 (62.9) | infliximab<br>60 (54.0) | Total<br>91(100) |
|------------------------------------------------------------------------|-----------------------|-------------------------|-------------------------|------------------|
| <b>Annual Review</b>                                                   |                       |                         |                         |                  |
| <i>A</i> consults*                                                     | 9 (100)               | 22 (100)                | 60 (100)                | 91(100)          |
| <i>B</i> laboratorial exams**                                          | 7 (77.8)              | 15 (68.2)               | 46 (76.7)               | 68 (74.8)        |
| <b>Clinical monitoring adequate</b>                                    |                       |                         |                         |                  |
| <i>C</i> <i>A</i> + <i>B</i>                                           | 7 (77.8)              | 15 (68.9)               | 46 (76.4)               | 68 (74.8)        |
| <b>Therapies</b>                                                       |                       |                         |                         |                  |
| <i>None</i>                                                            | 0 (0.0)               | 3 (13.6)                | 14 (23.3)               | 17 (18.7)        |
| <i>Only Topical</i>                                                    | 0 (0.0)               | 0 (0.0)                 | 0 (0.0)                 | 0 (0.0)          |
| <i>Only Phototherapy</i>                                               | 0 (0.0)               | 1 (4.5)                 | 4 (6.7)                 | 5 (5.5)          |
| <i>Only N-BIOSYS#</i>                                                  | 7 (77.8)              | 9 (40.9)                | 18 (30.0)               | 34 (37.4)        |
| <b>Combination of Therapies prior use of Biologic n (%)</b>            |                       |                         |                         |                  |
| <i>Topical</i> + <i>Phototherapy</i>                                   | 0 (0.0)               | 0 (0.0)                 | 0 (0.0)                 | 0 (0.0)          |
| <i>D</i> <i>Topical</i> + <i>N-BIOSYS#</i>                             | 1 (11.1)              | 3 (13.6)                | 8 (13.3)                | 12 (13.2)        |
| <i>Phototherapy</i> + <i>N-BIOSYS#</i>                                 | 1 (11.1)              | 4 (18.2)                | 13 (21.7)               | 18 (19.8)        |
| <i>E</i> <i>Topical</i> + <i>Phototherapy</i> + <i>N-BIOSYS</i>        | 0 (0.0)               | 2 (9.1)                 | 3 (5.0)                 | 5 (5.5)          |
| <b>F Recommended use of the biological agents according guidelines</b> |                       |                         |                         |                  |
| <i>D</i> + <i>E</i>                                                    | 1 (11.1)              | 5 (22.7)                | 11 (18.3)               | 17 (19.3)        |
| <b>Adherence of guideline</b>                                          |                       |                         |                         |                  |
| <i>Prior drugs and monitoring (C + D)</i>                              | 1 (11.1)              | 3 (13.6)                | 9 (15.0)                | 13 (14.2)        |

\*at least one annual medical consult; blood differential (complete blood cell count), liver function tests;

# use of biologic agent after treatment with topic and one systemic non biologic agent;

## DISCUSSION

### Main Findings

The key finding of this investigation is that very few patients obtaining payment for use of biologic agents for treatment of psoriasis had met guideline criteria for use of non-biologic therapy prior to commencing expensive and potentially toxic biologic agents (Tables 2 and 3). In particular, topical agents had seldom been used in these patients. In addition, approximately 30% had not used any non-biologic systemic agents. Further, of those still using biologic agents approximately 25% had not undergone the recommended laboratory investigations in the prior year. Thus, complete adherence to guideline recommendations for

1  
2  
3 prior therapy occurred in only 16.7% of patients and complete guideline adherence including  
4 prior therapy and laboratory monitoring in only 14.2% of those still using biologic agents  
5  
6 (Tables 2 and 3).  
7

8  
9 The patients in this sample did not have heart NYHA III / IV heart disease, a potential  
10 contraindication for TNFs (Table 1). However, the prevalent comorbidities detected in these  
11 patients involve the cardiovascular system, the main contraindication to the use of biological  
12 drugs (22). Thus, the pattern of comorbidity raises further concern regarding the use of  
13 biologic agents without, in approximately 30%, the prior use of non-biologic  
14 immunosuppressant therapy.  
15  
16  
17  
18

### 19 ***Strengths and weaknesses of the study***

20  
21 Strengths of this study include our ability to obtain a complete list of all individuals who  
22 succeeded in obtaining government payment for biologic agents for psoriasis. We were able  
23 to contact and obtain consent from 203 or 218 potentially eligible patients. We obtained  
24 pharmacy records of medication use and corroborating information from patient interviews.  
25 Duplicate review of interview recordings ensured accurate information. We surveyed a  
26 number of key guidelines including both public agencies and specialty societies from a  
27 number of countries and used as criteria only recommendations included in all the guidelines.  
28  
29  
30  
31  
32

33  
34 Possible limitations in our study include the possibility that patient's memory of prior  
35 medication use may not have been accurate. In particular, approximately 20% of patients  
36 reported no prior topical, phototherapy, or system therapy prior to use of biologic agents. The  
37 interviews, however, included detailed descriptions of medications, including topical agents,  
38 and patients' failure to remember the use of topical agents may be implausible. We did not  
39 obtain corroboration of reports of adverse effects or apparent improvement with the biologic  
40 agents, and these data are therefore suspect.  
41  
42  
43  
44

45  
46 Also we did not study the management of patients who have received biologics through the  
47 usual health care system (i.e. without recourse to the courts) represents another limitation of  
48 the study. Thus, our study provides only indirect evidence regarding how these patients are  
49 managed within the Brazilian system".  
50  
51  
52

### 53 ***Relation to evidence and recommendations***

1  
2  
3 The guidelines we reviewed were consistent in their recommendation that patients with  
4 severe psoriasis who do not respond or have a contraindication to or are intolerant to topical  
5 therapy and systemic therapy with immunosuppressant, including cyclosporine and  
6 methotrexate, are candidates for biologic therapies [5-8 15]. The guidelines also  
7 recommended phototherapy as an alternative. Despite evidence of the cost-effectiveness of  
8 phototherapy in moderate-to-severe psoriasis [19 20], guidelines did not insist on a trial of  
9 phototherapy before treatment with biologic agents. .  
10  
11  
12  
13

14  
15 Biologic agents may be associated with serious adverse effects, including an increase in the  
16 risk of malignancies opportunistic fungal infection, and lymphoma [10-12]. A particular  
17 concern is the use of drugs over the long term. Current the data available is insufficient to  
18 draw clear and reliable conclusions about either the efficacy of long-term treatments or the  
19 frequency of adverse effects over the long term [21-23]. The majority of plaintiffs are using  
20 biologics for over a year, and more than 10% for over three years, raising another possible  
21 concern.  
22  
23  
24  
25  
26

### 27 ***Implications.***

28  
29 Biologic agents are not included in Brazilian official guideline to treat psoriasis. Therefore,  
30 access to this medication is largely from prescriptions by private practioners. Having  
31 obtained a prescription for a biologic agent, Brazilian citizen can launch legal action to have  
32 the government pay for the high cost medication. It is perhaps ironic that despite the last  
33 report of the Brazilian health assessment technology committee (Conitec) choosing to not  
34 recommend (1) the use of these biological drugs in the treatment of psoriasis primarily  
35 because of safety concerns, judicial decisions in favor of their use requires the public health  
36 system to provide funding.  
37  
38  
39  
40  
41  
42

43  
44 One could argue that it may be unreasonable to ask judges to be aware of medical guidelines,  
45 particularly those arising from other jurisdictions. A proposed solution to this problem would  
46 be to provide the court with high quality technical analyses. In this case, experts in psoriasis  
47 aware of the guidelines would provide the analyses. So far, such analyses are unavailable  
48 [24-26]. Our results emphasize the need for technical analyses to guide court decisions,  
49 ideally considering two independent opinions.  
50  
51  
52  
53

54  
55 Irrespective of issues of whether governments should fund biologics in psoriasis at all,  
56 clinical practice and judicial decisions should be consistent with highly credible international  
57 guidelines. Our results show an important gap between clinical practice and judicial  
58  
59  
60



1  
2  
3 decisions in treatments prescribed to plaintiffs demanding medicines for Psoriasis in São  
4 Paulo, Brazil and corresponding guidelines.  
5  
6

7 Explanations for inappropriate practice include inadequate training and knowledge of the  
8 physicians who prescribe the drugs[27 28]. Another possibility is that incentives from the  
9 pharmaceutical industry are influencing the prescription of biologic agents in psoriasis.  
10 Whatever the reason, our findings demonstrate that the court system is not functioning well.  
11 This is not necessarily the fault of the judges, but of a system that does not ensure that judges  
12 have the appropriate access to expert guidance. Independent review by disinterested experts  
13 would have led the court to insist on appropriate prior treatment before considering biologic  
14 agents. The health system also appears negligent in not ensuring optimal follow-up to  
15 patients who receive payment for their drugs from the government. The responsibility for  
16 informing practitioners of optimal management could rest with the pharmaceutical industry,  
17 the national dermatologic society, or the government.  
18  
19  
20  
21  
22  
23  
24

25  
26 Our results suggest changes at both the level of clinical practice and the function of the  
27 judicial system are urgently needed.  
28  
29

30 What is already known on this subject?  
31  
32

33 Guidelines specify the circumstances in which biologic agents should be used in patients with  
34 psoriasis and the monitoring such patients should undergo. The extent to which clinicians  
35 follow these guidelines in a variety of clinical situations remains uncertain.  
36  
37

38 What this study adds?  
39  
40

41 In Brazil, major discrepancies exist between the management of patients who receive funding  
42 for biologic agents from the government through lawsuits and the management guidelines  
43 recommend. The majority of patients have not had the appropriate trials of less toxic drugs,  
44 and laboratory monitoring is suboptimal in approximately 25% of patients.  
45  
46  
47  
48  
49  
50  
51  
52  
53  
54  
55  
56  
57  
58  
59  
60

### *Acknowledgements*

The authors thanks support from FAPESP (Foundation for Research Support of the State of São Paulo) Process number 2009/0530841, at UNISO (University of Sorocaba), and pharmaceuticals Livia Marengo and Andressa Marcondes and Larissa Colombo Marcondes, Bruna Cipriano that have helped use doing part of extraction and interview of patients. We also thanks CODES SES-SP (Strategic Coordination Demands of Ministry of Health of São Paulo) for the cooperation in give us the data from the database and help us to find the lawsuit papers in their files

**Funding:** This work was supported by the FAPESP – Fundação de Amparo a Pesquisa - Process N. 2009/53084-1

**Contributors:** LL, IC, SBF and COC had the original idea and they developed the study protocol. GG, LL, MS and COC performed data analysis and drafted the manuscript. MS, FSDF, SBF, MCC and IC contributed to data collection. All authors contributed to the preparation of the manuscript and read and approved the final version.

**Competing interests:** none.

**Data Sharing Statement:** No additional data available.

**Ethics approval:** this study is part of PSAR Project approved by committee for clinical research of University of Sorocaba on August 17, 2009, with protocol number 011/2009.

## REFERENCES

1. Zachariae H. Prevalence of joint disease in patients with psoriasis: implications for therapy. *Am J Clin Dermatol* 2003;**4**:441-7
2. Rapp SR, Feldman SR, Exum ML, et al. Psoriasis causes as much disability as other major medical diseases. *J Am Acad Dermatol* 1999;**41**(3 Pt 1):401-7
3. Menter A, CE. G. Current and future management of psoriasis. *Lancet* 2007;**370**:272-84
4. Smith CH, JNWN B. Psoriasis and its management. *BMJ Publishing* 2006;**333**:380-4
5. NICE. Psoriasis: the assessment and management of psoriasis. National Institute for Health and Clinical Excellence - Clinical Guidelines 2012
6. SIGN. Scottish Intercollegiate Guidelines Network . Diagnosis and management of psoriasis and psoriatic arthritis in adults. A national clinical guideline. Edinburgh (Scotland): Scottish Intercollegiate Guidelines Network (SIGN) 2010 **121**:65 p
7. Nast A, Boehncke WH, Mrowietz U, et al. S3 - Guidelines on the treatment of psoriasis vulgaris (English version). Update. *Journal der Deutschen Dermatologischen Gesellschaft = Journal of the German Society of Dermatology : JDDG* 2012;**10 Suppl 2**:S1-95 doi: 10.1111/j.1610-0387.2012.07919.x[published Online First: Epub Date]] .
8. Smith CH, Anstey AV, Barker JN, et al. British Association of Dermatologists' guidelines for biologic interventions for psoriasis 2009. *The British journal of dermatology* 2009;**161**(5):987-1019 doi: 10.1111/j.1365-2133.2009.09505.x[published Online First: Epub Date]] .
9. SBD. Consenso Brasileiro de Psoríase 2012 - Guias de avaliação e tratamento Sociedade Brasileira de Dermatologia. – 2 ed. Rio de Janeiro: Sociedade Brasileira de Dermatologia. 2012
10. Dommasch ED, Abuabara K, Shin DB, et al. The risk of infection and malignancy with tumor necrosis factor antagonists in adults with psoriatic disease: a systematic review and meta-analysis of randomized controlled trials. *J Am Acad Dermatol* 2011;**64**(6):1035-50 doi: 10.1016/j.jaad.2010.09.734[published Online First: Epub Date]] .
11. Bongartz T, Sutton AJ, Sweeting MJ, et al. Anti-TNF antibody therapy in rheumatoid arthritis and the risk of serious infections and malignancies: systematic review and meta-analysis of rare harmful effects in randomized controlled trials. *JAMA : the journal of the American Medical Association* 2006;**295**(19):2275-85 doi: 10.1001/jama.295.19.2275[published Online First: Epub Date]] .
12. Singh JA, Wells GA, Christensen R, et al. Adverse effects of biologics: a network meta-analysis and Cochrane overview. *Cochrane database of systematic reviews* 2011(2):CD008794 doi: 10.1002/14651858.CD008794.pub2[published Online First: Epub Date]] .
13. Psoriasis: the assessment and management of psoriasis. National Institute for Health and Clinical Excellence - Clinical Guidelines 2012
14. Guidelines of care for the management of psoriasis and psoriatic arthritis. Section 1. Overview of psoriasis and guidelines of care for the treatment of psoriasis with biologics. . American Academy of Dermatology 2008
15. Papp K, Gulliver W, Lynde C, et al. Canadian guidelines for the management of plaque psoriasis: overview. *Journal of cutaneous medicine and surgery* 2011;**15**(4):210-9
16. Pathirana D, Ormerod AD, Saiag P, et al. European S3-guidelines on the systemic treatment of psoriasis vulgaris. *Journal of the European Academy of Dermatology and Venereology : JEADV* 2009;**23 Suppl 2**:1-70 doi: 10.1111/j.1468-3083.2009.03389.x[published Online First: Epub Date]] .
17. GRUPO. IBOPE INTELIGÊNCIA. Coleta de dados. Diversos métodos para atender à sua demanda. Publicação em 28/04/2009. <http://www.ibope.com.br>. Acesso em 28 ju. 2011. 2011
18. LIPE. PESQUISAS. Dúvidas frequentes: o que é CATI ? Disponível em <http://www.lipe.com.br>. Acesso em 28 jul. 2011. 2011

19. Miller DW, Feldman SR. Cost-effectiveness of moderate-to-severe psoriasis treatment. *Expert opinion on pharmacotherapy* 2006;**7**(2):157-67 doi: 10.1517/14656566.7.2.157[published Online First: Epub Date]].
20. Pearce DJ, Thomas CG, Fleischer AB, Jr., et al. The cost of psoriasis therapies: considerations for therapy selection. *Dermatology nursing / Dermatology Nurses' Association* 2004;**16**(5):421-8, 32
21. Lucka TC, Pathirana D, Sammain A, et al. Efficacy of systemic therapies for moderate-to-severe psoriasis: a systematic review and meta-analysis of long-term treatment. *Journal of the European Academy of Dermatology and Venereology* 2012;**26**(11):1331-44 doi: 10.1111/j.1468-3083.2012.04492.x[published Online First: Epub Date]].
22. Schmitt J, Zhang Z, Wozel G, et al. Efficacy and tolerability of biologic and nonbiologic systemic treatments for moderate-to-severe psoriasis: meta-analysis of randomized controlled trials. *The British journal of dermatology* 2008;**159**(3):513-26 doi: 10.1111/j.1365-2133.2008.08732.x[published Online First: Epub Date]].
23. Naldi L, Rznay B. Psoriasis (chronic plaque). *Clinical evidence* 2009;**1706**(1):1-109
24. Vieira FS, Zucchi P. Distorções causadas pelas ações judiciais à política de medicamentos no Brasil. *Revista de Saúde Pública* 2007;**41**:214-22
25. Biehl J, Amon JJ, Socal MP, et al. Between the court and the clinic: lawsuits for medicines and the right to health in Brazil. *Health Hum Rights* 2012;**14**(1):E36-52
26. Chieffi AL, Barata RB. ['Judicialization' of public health policy for distribution of medicines]. *Cad Saude Publica* 2009;**25**(8):1839-49
27. Grimshaw JM, Eccles MP, Lavis JN, et al. Knowledge translation of research findings. *Implementation science : IS* 2012;**7**:50 doi: 10.1186/1748-5908-7-50[published Online First: Epub Date]].
28. Cabana MD, Rand CS, Powe NR, et al. Why don't physicians follow clinical practice guidelines? A framework for improvement. *JAMA* 1999;**282**(15):1458-65

**TITLE: Adherence to guidelines in use of biological agents to treat psoriasis in Brazil**

**AUTHORS**

**Miriam Sanches do Nascimento Silveira, MSc**

*Pharmaceutical Sciences Post graduate Course, University of Sorocaba, UNISO, Brazil.*  
*miriam.silveira@prof.uniso.br*

**Iara Alves de Camargo MSc**

*Pharmaceutical Sciences Post graduate Course, University of Sorocaba, UNISO, Brazil. Codes -  
Secretaria Estadual de Saúde – São Paulo*  
*iadec@uol.com.br*

**Mayara Costa de Camargo**

*Pharmaceutical Sciences Post graduate Course, University of Sorocaba, UNISO, Brazil*  
*mah-camargo@hotmail.com*

**Claudia Garcia Serpa Osorio-de-Castro, PhD**

*Núcleo de Assistência Farmacêutica, Escola Nacional de Saúde Pública Sérgio Arouca - Fundação  
Oswaldo Cruz – Fiocruz*  
*claudia.osorio@ensp.fiocruz.br*

**Silvio Barberato-Filho, PhD**

*Programa de Pós-Graduação em Ciências Farmacêuticas da Universidade de Sorocaba, SP*  
*silvio.barberato@prof.uniso.br*

**Fernando de Sá Del Fiol, PhD**

*Programa de Pós-Graduação em Ciências Farmacêuticas da Universidade de Sorocaba, SP*  
*fernando.fiol@prof.uniso.br*

**Gordon Guyatt MD, MSc**

*Department of Clinical Epidemiology and Biostatistics, McMaster University, Canada.*  
*guyatt@mcmaster.ca*

**Luciane Cruz Lopes, PhD**

*Pharmaceutical Sciences Post graduate Course, University of Sorocaba, UNISO, Brazil.*  
*luslopes@terra.com.br*

**Contact information for the corresponding author:** Luciane Cruz Lopes,

*luslopes@terra.com.br*

- ✓ **Financial support:** FAPESP – Fundação de Amparo a Pesquisa - Process N. 2009/53084-1
- ✓ **No conflict of interest**
- ✓ **Word count: 2284**
- ✓ **Protocol approved ethics committee: 11/2009**
- ✓ **There is no additional data available**
- ✓ **Key words:** psoriasis, biological, guidelines, health public, policy, Brazil.

✓ **TITLE: Adherence to guidelines in use of biological agents to treat psoriasis in Brazil**

**ABSTRACT**

[BACKGROUND]: In São Paulo, Brazil, patients gain funding for biological agents for treatment of psoriasis through lawsuits to the government. The extent to which management of such patients adhere to authoritative guidelines is uncertain.

[OBJECTIVE]: To determine the extent to which clinical practice adheres to authoritative guidelines in patients receiving treatment for psoriasis through lawsuits.

[METHODS]: We identified patients through records of the State Health Secretariat of São Paulo from 2004 to 2011. We consulted guidelines from five countries and chose as standards only those recommendations that the guidelines uniformly endorsed. Pharmacy records provided data regarding biologic use. Guidelines recommended biologics agents only in patients with severe psoriasis who have failed to respond to both topical and systemic therapies (e.g. cyclosporine and methotrexate) and recommended yearly monitoring of blood counts and liver function.

[RESULTS]: Of 218 patients identified in the database, 3 did not meet eligibility criteria and 12 declined participation. Of 203 patients interviewed, 91 were still using biological medicine; we established adherence to laboratory monitoring in these patients. In the total sample, management failed to meet standards of prior use of topical and systemic medication in 169 (83.2%) of the patients. .Of the 91 patient using biological medicine at the time of the survey, 23 (25.2%) did not undergo appropriate laboratory tests.

[CONCLUSIONS]: Important discrepancies exist between clinical practice and the recommendations of guidelines the management of plaintiffs using biologic drugs to treat psoriasis.

**Strengths and limitations**

1. Strengths of this study include our ability to obtain a complete list of all individuals who succeeded in obtaining government payment for biologic agents for psoriasis.
2. We obtained pharmacy records of medication use and corroborating information from patient interviews.
3. Duplicate review of interview recordings ensured accurate information.
4. Possible limitations in our study include the possibility that patients memory of prior medication use may not have been accurate.
5. The interviews, however, included detailed descriptions of medications, including topical agents, and patients' failure to remember the use of topical agents may be implausible.
6. We did not obtain corroboration of reports of adverse effects or apparent improvement with the biologic agents, and these data are therefore suspect.
7. We did not study the management of patients who have received biologics through the usual health care system.

## INTRODUCTION

Psoriasis, chronic inflammatory immune-mediated skin disease that predominantly affects the skin and joints occurs in between 1.5 to 3% of the population[1]. Onset may occur at any age but peaks in the second and third decades. The severity of psoriasis varies widely, and its course is characterized by relapses and remissions, though it usually persists throughout life. Its negative impact on health-related quality of life is similar to that of ischemic heart disease, diabetes, depression and cancer [2].

The significant reduction in quality of life and the psychosocial disability suffered by patients highlight the need for prompt, effective treatment, and long-term disease control[3 4]. In mild psoriasis, topical treatment can be effective[5]. Those with moderate to severe disease often require treatment with phototherapy and systemic treatment[6]. When systemic traditional treatment with cyclosporine, methotrexate, or acitretin fail (non-biologic systemic agents or N-BISYS), systemic biological therapies such as the tumor necrosis factor antagonists' adalimumab, etanercept and infliximab, and the monoclonal antibody ustekimumab that targets interleukin-12 (IL-12) and IL-23 become options.[6-9].

Due to their immunosuppressive activity, some anti-TNFs have been associated with a small increased risk of infection in patients with psoriasis[10], and studies of TNF antagonist use in other disease areas have raised concerns over a potential link to cardiovascular side-effects, malignancies, and neurological defects[10-12]. Guidelines uniformly recommend at least one annual patient review to check for infections, malignancies, and other adverse effects of biologics agents.

In Brazil patients can, once they are prescribed by a clinician, go to the courts to force the state to pay for expensive medication such as biologics. Court decisions may not be consistent with optimal standards of care in terms of patients who are appropriate for use of biologics. Furthermore, once patients receive biologics through court decisions, subsequent management may not be optimal.

The objective of this study was to identify standards of management of psoriasis common to major international guidelines and to evaluate the extent to which Brazilian physicians who prescribed biologics that courts approved on the basis of law suits adhered to these standards.



## METHODS

The protocol (cross-sectional design) was authorized by the State Department of Health (SES-SP) and also approved by the ethics committee for clinical research of University of Sorocaba on August 17, 2009, with protocol number 011/2009.

### Choice of Guidelines and Guideline Recommendations

We consulted guidelines from the following countries: United Kingdom[13], Germany[7], Brazil,[9] United States[14], Canada[15] and European[16]. We used both national guidelines (NICE, SIGN)[5 6] and specialty society guidelines. We reviewed all recommendations in each guideline and chose as standards only those recommendations that for prior treatment were uniformly endorsed across all guidelines and for monitoring were endorsed by 4 of the 5 guidelines.

Recommendations uniformly endorsed by every guideline[5-9] specified that biologics should only be used in patients with severe psoriasis who had failed to respond to, have a contraindication to, or are intolerant of topical therapies, and at least one systemic therapy (e.g. cyclosporine or methotrexate). Guidelines also uniformly recommend at least one annual patient review to check for infections, malignancies, and other adverse effects of biologics agents and also to evaluate control of psoriasis. Guidelines specified that the review should include monitoring of complete blood cell count and liver function tests.

### Eligibility Criteria

Patients were eligible if they had, through lawsuits filed against the state of São Paulo in the period 2004-2010, gained access to biologics for treatment of psoriasis. All patients gave informed consent.

### Identification of Patients and Collection of Patient Data

In order to identify eligible patients, two researchers abstracted data from all the dispensing orders in the database for psoriasis - identified by ICD code L40 - originating from lawsuits from 2004-2010 including the name, address and telephone number, gender, age, healthcare provider, whether that provider worked in the public or private system, type of biologic dispensed, and diagnoses. We excluded patient with arthritis psoriatic.

1  
2  
3 We contacted patients with psoriasis by telephone, and if they proved eligible and agreed to  
4 participate in the study, conducted interviews. The interviews were conducted by telephone  
5 using Computer Assisted Telephonic Interviews (ITAC) technology with a microcomputer  
6 handset with headphones. This system allows recording and monitoring of the duration of  
7 the conversation [17 18]. Research staff working in pairs independently recorded data from  
8 the interviews, with discrepancies resolved by the principle investigator (LL).  
9

10  
11  
12  
13  
14 The interview schedule was developed in consultation with a local dermatologist (see  
15 **Appendix**) after consideration of the recommendations consistent across guidelines. An  
16 electronic form was developed in Microsoft Office Access based on the instrument developed  
17 for the interviews. To address the items listed in the instrument, 16 screens were designed to  
18 record the data from the interviews. Each interviewer received training on use of language  
19 related to each question in the interview schedule. The questionnaire included the following:  
20 what drugs the patient was using for the treatment of psoriasis prior to the court judgment, the  
21 time of diagnosis of psoriasis, comorbidities and whether patients received at least annual  
22 review. For patients still taking biologics we determined if they had received a medical  
23 consultation in the previous year and what tests had been undertaken in the previous year. In  
24 Brazil, patients receive records of all their laboratory tests and typically retain these records  
25 indefinitely; all patients still receiving biologics reported that they had retained records of all  
26 of laboratory tests undertaken during the previous year.  
27

28  
29  
30  
31  
32  
33  
34  
35  
36 Patients' report of the period in which they used the biologics were cross-checked with data  
37 obtained from pharmacy records and from legal records from lawsuits. Legal records from  
38 lawsuits gave us the name of patients, name of the drugs obtained through the law suit,  
39 whether the prescription came from private or public insurance, sex, diagnostic and age of  
40 patients. If we found discrepancy between the three sources of information, we considered  
41 the information from pharmacy records definitive. Thus, definitive information about the  
42 name of the biologic and the duration of use of the biologic was obtained from the pharmacy,  
43 and definitive information of the time of diagnosis, use of previous medicines, and laboratory  
44 results was obtained from the patient. We considered guideline adherence adequate when  
45 court decisions and subsequent clinical care had adhered to all recommendations from  
46 guidelines.  
47  
48  
49  
50  
51  
52  
53  
54  
55  
56  
57  
58  
59  
60

1  
2  
3 In the interviews we also asked patients about their adverse effects and whether these led to  
4 discontinuing medications and their perception of the effectiveness of the biologic agents.  
5  
6  
7

## 8 **RESULTS**

9  
10 We reviewed 25,184 lawsuits that had succeeded in obtaining medicines, dietary  
11 supplements, or other health products, such as orthotics and prosthetics, and diagnostic and  
12 therapeutic procedures in the period deposited in the Public Finance Courts Capital in period  
13 2004 to 2010. Of 218 patients identified as using biologics for psoriasis, in 3 the contact  
14 information was a law office that did not allow us to contact patients, 1 patient had died, 2  
15 had never used the biologic that was mandated by the court decision, and 9 refused the  
16 interview. We interviewed 203 patients, of whom 91 (44.8%) were still using a biologic  
17 agent (Figure 1).  
18  
19  
20  
21  
22  
23  
24  
25

26 Eligible patients received one of four biologic drugs: adalimumab, etanercept, infliximab and  
27 efalizumab. Table 1 presents the socio demographic and medical health characteristics of the  
28 203 eligible patients as well as the duration patients used the biologic agents granted payment  
29 by the courts. Over a third of the patients used the biologic agents for less than a year, and  
30 over 50% for 1 to 3 years.  
31  
32  
33  
34  
35  
36  
37  
38  
39  
40  
41  
42  
43  
44  
45  
46  
47  
48  
49  
50  
51  
52  
53  
54  
55  
56  
57  
58  
59  
60

Table 1 - Baseline characteristics of plaintiffs with psoriasis

|                                             | Patients<br>N=203 | %           |
|---------------------------------------------|-------------------|-------------|
| <b>City of residence</b>                    |                   |             |
| <i>São Paulo</i>                            | 122               | 60          |
| <i>Other</i>                                | 81                | 40          |
| <b>Health care</b>                          |                   |             |
| <i>Private</i>                              | 141               | 69.5        |
| <b>Sex</b>                                  |                   |             |
| <i>Male</i>                                 | 129               | 63.5        |
| <b>Age (years)</b>                          |                   |             |
| <i>19 - 59</i>                              | 156               | 76.9        |
| <i>≥ 60</i>                                 | 47                | 23.1        |
| <i>mean ± sd</i>                            |                   | 48.9 ± 13.7 |
| <b>Time of diagnosis (years previous)</b>   |                   |             |
| <i>6 or more</i>                            | 177               | 84.9        |
| <i>2 - 5</i>                                | 25                | 10.2        |
| <i>≤1 year</i>                              | 1                 | 0.5         |
| <b>Comorbidities</b>                        |                   |             |
| <i>None</i>                                 | 128               | 63          |
| <i>Cardiovascular disease</i>               | 26                | 12.8        |
| <i>Diabetes mellitus</i>                    | 12                | 5.9         |
| <i>Others</i>                               | 37                | 18.2        |
| <b>Duration of use of biologic (months)</b> |                   |             |
| <i>12 or less</i>                           | 69                | 34.0        |
| <i>13 to 36</i>                             | 110               | 54.2        |
| <i>37 to 72</i>                             | 24                | 11.8        |

*Sd= standard deviation*

Table 2 presents the use of non-biologic medications prior to the law suit decision to pay for the use of a biologic agent. Over 20% of the patients had not used any conventional interventions - either topical, light, or systemic agents - for psoriasis prior to launching their law suit for use of biologic agents. Topical agents were used very infrequently - in only approximately 16% of patients. Phototherapy was similarly infrequently used - in 36.9% of the patients. Approximately 71% of the patients had used non-biologic systemic therapy before their law suit. No patients had contraindications, or were using drugs with problematic interactions, that would have prevented the use of all recommended systemic agents (cyclosporine, methotrexate, and acitretin). Given that guideline adherence requires use topical and systematic therapy before beginning biologic use, only 34 patients (16.7%) met guideline requirements.

**Table 2 – Treatment prior to initiating law suit for biologic use.**

|                                                                                   | adalimumab | efalizumab | etanercept | infliximab | Total     |
|-----------------------------------------------------------------------------------|------------|------------|------------|------------|-----------|
|                                                                                   | 14 (6.9)   | 43 (21.2)  | 35 (17.2)  | 111 (54.7) | 203 (100) |
| <b>Therapies</b>                                                                  |            |            |            |            |           |
| None                                                                              | 1 (7.1)    | 12 (27.9)  | 6 (17.1)   | 25 (22.5)  | 44 (21.7) |
| Only Topical                                                                      | 0          | 0          | 0          | 0          | 0         |
| Only Phototherapy                                                                 | 0 (0.0)    | 5 (11.6)   | 3 (8.7)    | 7 (6.3)    | 15 (7.4)  |
| Only N-BIOSYS#                                                                    | 10 (71.4)  | 2 (4.6)    | 12 (34.3)  | 36 (32.4)  | 60 (29.6) |
| <b>Combination of Therapies prior use of Biologic n (%)</b>                       |            |            |            |            |           |
| Topical+ Phototherapy                                                             | 0          | 0          | 0          | 0          | 0         |
| Topical + N-BIOSYS#                                                               | 1 (7.1)    | 4 (9.3)    | 3 (8.6)    | 16(14.4 )  | 24 (11.8) |
| Phototherapy + N-BIOSYS#                                                          | 2 ( )      | 18 (41.8)  | 8 (22.8)   | 22 (19.8)  | 50 (24.6) |
| Topical+Phototherapy+N-BIOSYS#                                                    | 0 (0.0)    | 2 (4.6)    | 3 ( 8.6)   | 5 (4.5)    | 10 (4.9)  |
| <b>Recommended use of the biological agents according guidelines (7-10) n (%)</b> |            |            |            |            |           |
| Topical + N-BIOSYS                                                                | 1 (7.1)    | 6 (14.0)   | 6 (17.1)   | 21 (18.9)  | 34 (16.7) |

# acitretin, methotrexate; ciclosporine; sd – standard deviation; PSO – psoriasis

# acitretin, methotrexate; ciclosporin; sd – standard deviation; N-BIOSYS – non biologic systemic agents

Table 3 presents findings in the 91 patients who were still using a biologic agent at the time of the interview. The pattern of prior use was similar to the overall group, with 19.3% of patients having used both a topical agent and systemic therapy. All patients had visited a doctor at least once a year, but 25.2% did not undergo the recommended laboratory tests (blood count, differential count, liver function) (Table 3). Thus, only 14.2% of the patients met guideline criteria for both use of prior agents and appropriate monitoring.

Of the 203 respondents 134 (66%) perceived that they experienced important improvement with use of biologic agents, although 20 patients reported a deterioration they attributed to the biologic agents. Adverse effects severe enough to discontinue medication were reported by 23 patients (11.3%).

**Table 3 - Clinical follow up and outcome judgment in patient with psoriasis still taking biologic agent.**

| Outcomes                                                               | adalimumab | etanercept | infliximab | Total     |
|------------------------------------------------------------------------|------------|------------|------------|-----------|
|                                                                        | 9 (9.9)    | 22 (62.9)  | 60 (54.0)  | 91(100)   |
| <b>Annual Review</b>                                                   |            |            |            |           |
| <i>A</i> consults*                                                     | 9 (100)    | 22 (100)   | 60 (100)   | 91(100)   |
| <i>B</i> laboratorial exams**                                          | 7 (77.8)   | 15 (68.2)  | 46 (76.7)  | 68 (74.8) |
| <b>Clinical monitoring adequate</b>                                    |            |            |            |           |
| <i>C</i> <i>A</i> + <i>B</i>                                           | 7 (77.8)   | 15 (68.9)  | 46 (76.4)  | 68 (74.8) |
| <b>Therapies</b>                                                       |            |            |            |           |
| <i>None</i>                                                            | 0 (0.0)    | 3 (13.6)   | 14 (23.3)  | 17 (18.7) |
| <i>Only Topical</i>                                                    | 0 (0.0)    | 0 (0.0)    | 0 (0.0)    | 0 (0.0)   |
| <i>Only Phototherapy</i>                                               | 0 (0.0)    | 1 (4.5)    | 4 (6.7)    | 5 (5.5)   |
| <i>Only N-BIOSYS#</i>                                                  | 7 (77.8)   | 9 (40.9)   | 18 (30.0)  | 34 (37.4) |
| <b>Combination of Therapies prior use of Biologic n (%)</b>            |            |            |            |           |
| <i>Topical</i> + <i>Phototherapy</i>                                   | 0 (0.0)    | 0 (0.0)    | 0 (0.0)    | 0 (0.0)   |
| <i>D</i> <i>Topical</i> + <i>N-BIOSYS#</i>                             | 1 (11.1)   | 3 (13.6)   | 8 (13.3)   | 12 (13.2) |
| <i>Phototherapy</i> + <i>N-BIOSYS#</i>                                 | 1 (11.1)   | 4 (18.2)   | 13 (21.7)  | 18 (19.8) |
| <i>E</i> <i>Topical</i> + <i>Phototherapy</i> + <i>N-BIOSYS</i>        | 0 (0.0)    | 2 (9.1)    | 3 (5.0)    | 5 (5.5)   |
| <b>F Recommended use of the biological agents according guidelines</b> |            |            |            |           |
| <i>D</i> + <i>E</i>                                                    | 1 (11.1)   | 5 (22.7)   | 11 (18.3)  | 17 (19.3) |
| <b>Adherence of guideline</b>                                          |            |            |            |           |
| <i>Prior drugs and monitoring (C + D)</i>                              | 1 (11.1)   | 3 (13.6)   | 9 (15.0)   | 13 (14.2) |

\*at least one annual medical consult; blood differential (complete blood cell count), liver function tests;

# use of biologic agent after treatment with topic and one systemic non biologic agent;

## DISCUSSION

### Main Findings

The key finding of this investigation is that very few patients obtaining payment for use of biologic agents for treatment of psoriasis had met guideline criteria for use of non-biologic therapy prior to commencing expensive and potentially toxic biologic agents (Tables 2 and 3). In particular, topical agents had seldom been used in these patients. In addition, approximately 30% had not used any non-biologic systemic agents. Further, of those still using biologic agents approximately 25% had not undergone the recommended laboratory investigations in the prior year. Thus, complete adherence to guideline recommendations for

1  
2  
3 prior therapy occurred in only 16.7% of patients and complete guideline adherence including  
4 prior therapy and laboratory monitoring in only 14.2% of those still using biologic agents  
5  
6 (Tables 2 and 3).  
7

8  
9 **The patients in this sample did not have heart NYHA III / IV heart disease, a potential**  
10 **contraindication for TNFs (Table 1).** However, the prevalent comorbidities detected in these  
11 patients involve the cardiovascular system, the main contraindication to the use of biological  
12 drugs (22). Thus, the pattern of comorbidity raises further concern regarding the use of  
13 biologic agents without, in approximately 30%, the prior use of non-biologic  
14 immunosuppressant therapy.  
15  
16  
17

### 18 19 ***Strengths and weaknesses of the study***

20  
21 Strengths of this study include our ability to obtain a complete list of all individuals who  
22 succeeded in obtaining government payment for biologic agents for psoriasis. We were able  
23 to contact and obtain consent from 203 or 218 potentially eligible patients. We obtained  
24 pharmacy records of medication use and corroborating information from patient interviews.  
25 Duplicate review of interview recordings ensured accurate information. We surveyed a  
26 number of key guidelines including both public agencies and specialty societies from a  
27 number of countries and used as criteria only recommendations included in all the guidelines.  
28  
29  
30  
31  
32

33  
34 Possible limitations in our study include the possibility that patient's memory of prior  
35 medication use may not have been accurate. In particular, approximately 20% of patients  
36 reported no prior topical, phototherapy, or system therapy prior to use of biologic agents. The  
37 interviews, however, included detailed descriptions of medications, including topical agents,  
38 and patients' failure to remember the use of topical agents may be implausible. We did not  
39 obtain corroboration of reports of adverse effects or apparent improvement with the biologic  
40 agents, and these data are therefore suspect.  
41  
42  
43  
44

45  
46 Also we did not study the management of patients who have received biologics through the  
47 usual health care system (i.e. without recourse to the courts) represents another limitation of  
48 the study. Thus, our study provides only indirect evidence regarding how these patients are  
49 managed within the Brazilian system".  
50  
51  
52

### 53 54 55 ***Relation to evidence and recommendations***

1  
2  
3 The guidelines we reviewed were consistent in their recommendation that patients with  
4 severe psoriasis who do not respond or have a contraindication to or are intolerant to topical  
5 therapy and systemic therapy with immunosuppressant, including cyclosporine and  
6 methotrexate, are candidates for biologic therapies [5-8 15]. The guidelines also  
7 recommended phototherapy as an alternative. Despite evidence of the cost-effectiveness of  
8 phototherapy in moderate-to-severe psoriasis [19 20], guidelines did not insist on a trial of  
9 phototherapy before treatment with biologic agents. .  
10  
11  
12  
13

14  
15 Biologic agents may be associated with serious adverse effects, including an increase in the  
16 risk of malignancies opportunistic fungal infection, and lymphoma [10-12]. A particular  
17 concern is the use of drugs over the long term. Current the data available is insufficient to  
18 draw clear and reliable conclusions about either the efficacy of long-term treatments or the  
19 frequency of adverse effects over the long term [21-23]. The majority of plaintiffs are using  
20 biologics for over a year, and more than 10% for over three years, raising another possible  
21 concern.  
22  
23  
24  
25  
26

### 27 ***Implications.***

28  
29 Biologic agents are not included in Brazilian official guideline to treat psoriasis. Therefore,  
30 access to this medication is largely from prescriptions by private practioners. Having  
31 obtained a prescription for a biologic agent, Brazilian citizen can launch legal action to have  
32 the government pay for the high cost medication. It is perhaps ironic that despite the last  
33 report of the Brazilian health assessment technology committee (Conitec) choosing to not  
34 recommend (1) the use of these biological drugs in the treatment of psoriasis primarily  
35 because of safety concerns, judicial decisions in favor of their use requires the public health  
36 system to provide funding.  
37  
38  
39  
40  
41  
42

43  
44 One could argue that it may be unreasonable to ask judges to be aware of medical guidelines,  
45 particularly those arising from other jurisdictions. A proposed solution to this problem would  
46 be to provide the court with high quality technical analyses. In this case, experts in psoriasis  
47 aware of the guidelines would provide the analyses. So far, such analyses are unavailable  
48 [24-26]. Our results emphasize the need for technical analyses to guide court decisions,  
49 ideally considering two independent opinions.  
50  
51  
52  
53

54  
55 Irrespective of issues of whether governments should fund biologics in psoriasis at all,  
56 clinical practice and judicial decisions should be consistent with highly credible international  
57 guidelines. Our results show an important gap between clinical practice and judicial  
58  
59  
60



1  
2  
3 decisions in treatments prescribed to plaintiffs demanding medicines for Psoriasis in São  
4 Paulo, Brazil and corresponding guidelines.  
5  
6

7 Explanations for inappropriate practice include inadequate training and knowledge of the  
8 physicians who prescribe the drugs[27 28]. Another possibility is that incentives from the  
9 pharmaceutical industry are influencing the prescription of biologic agents in psoriasis.  
10 Whatever the reason, our findings demonstrate that the court system is not functioning well.  
11 This is not necessarily the fault of the judges, but of a system that does not ensure that judges  
12 have the appropriate access to expert guidance. Independent review by disinterested experts  
13 would have led the court to insist on appropriate prior treatment before considering biologic  
14 agents. The health system also appears negligent in not ensuring optimal follow-up to  
15 patients who receive payment for their drugs from the government. The responsibility for  
16 informing practitioners of optimal management could rest with the pharmaceutical industry,  
17 the national dermatologic society, or the government.  
18  
19

20  
21  
22 Our results suggest changes at both the level of clinical practice and the function of the  
23 judicial system are urgently needed.  
24  
25

26  
27  
28 What is already known on this subject?  
29

30  
31  
32 Guidelines specify the circumstances in which biologic agents should be used in patients with  
33 psoriasis and the monitoring such patients should undergo. The extent to which clinicians  
34 follow these guidelines in a variety of clinical situations remains uncertain.  
35  
36

37  
38  
39 What this study adds?  
40

41  
42 In Brazil, major discrepancies exist between the management of patients who receive funding  
43 for biologic agents from the government through lawsuits and the management guidelines  
44 recommend. The majority of patients have not had the appropriate trials of less toxic drugs,  
45 and laboratory monitoring is suboptimal in approximately 25% of patients.  
46  
47

#### 48 *Acknowledgements*

49  
50 The authors thanks support from FAPESP (Foundation for Research Support of the State of  
51 São Paulo) Process number 2009/0530841, at UNISO (University of Sorocaba), and  
52 pharmaceuticals Livia Marengo and Andressa Marcondes and Larissa Colombo Marcondes,  
53 Bruna Cipriano that have helped use doing part of extraction and interview of patients. We  
54 also thanks CODES SES-SP (Strategic Coordination Demands of Ministry of Health of São  
55  
56  
57  
58  
59  
60

Paulo) for the cooperation in give us the data from the database and help us to find the lawsuit papers in their files

**Contributors:** LL, IC, SBF and COC had the original idea and they developed the study protocol. GG, LL, MS and COC performed data analysis and drafted the manuscript. MS, FSDF, SBF, MCC and IC contributed to data collection. All authors contributed to the preparation of the manuscript and read and approved the final version.

**Competing interests:** none.

**Ethics approval:** this study is part of PSAR Project approved by committee for clinical research of University of Sorocaba on August 17, 2009, with protocol number 011/2009.

## REFERENCES

1. Zachariae H. Prevalence of joint disease in patients with psoriasis: implications for therapy. *Am J Clin Dermatol* 2003;**4**:441-7
2. Rapp SR, Feldman SR, Exum ML, et al. Psoriasis causes as much disability as other major medical diseases. *J Am Acad Dermatol* 1999;**41**(3 Pt 1):401-7
3. Menter A, CE. G. Current and future management of psoriasis. *Lancet* 2007;**370**:272-84
4. Smith CH, JNWN B. Psoriasis and its management. *BMJ Publishing* 2006;**333**:380-4
5. NICE. Psoriasis: the assessment and management of psoriasis. National Institute for Health and Clinical Excellence - Clinical Guidelines 2012
6. SIGN. Scottish Intercollegiate Guidelines Network . Diagnosis and management of psoriasis and psoriatic arthritis in adults. A national clinical guideline. Edinburgh (Scotland): Scottish Intercollegiate Guidelines Network (SIGN) 2010 **121**:65 p
7. Nast A, Boehncke WH, Mrowietz U, et al. S3 - Guidelines on the treatment of psoriasis vulgaris (English version). Update. *Journal der Deutschen Dermatologischen Gesellschaft = Journal of the German Society of Dermatology : JDDG* 2012;**10 Suppl 2**:S1-95 doi: 10.1111/j.1610-0387.2012.07919.x[published Online First: Epub Date]] .
8. Smith CH, Anstey AV, Barker JN, et al. British Association of Dermatologists' guidelines for biologic interventions for psoriasis 2009. *The British journal of dermatology* 2009;**161**(5):987-1019 doi: 10.1111/j.1365-2133.2009.09505.x[published Online First: Epub Date]].
9. SBD. Consenso Brasileiro de Psoríase 2012 - Guias de avaliação e tratamento Sociedade Brasileira de Dermatologia. – 2 ed. Rio de Janeiro: Sociedade Brasileira de Dermatologia. 2012
10. Dommasch ED, Abuabara K, Shin DB, et al. The risk of infection and malignancy with tumor necrosis factor antagonists in adults with psoriatic disease: a systematic review and meta-analysis of randomized controlled trials. *J Am Acad Dermatol* 2011;**64**(6):1035-50 doi: 10.1016/j.jaad.2010.09.734[published Online First: Epub Date]].
11. Bongartz T, Sutton AJ, Sweeting MJ, et al. Anti-TNF antibody therapy in rheumatoid arthritis and the risk of serious infections and malignancies: systematic review and meta-analysis of rare harmful effects in randomized controlled trials. *JAMA : the journal of the American Medical Association* 2006;**295**(19):2275-85 doi: 10.1001/jama.295.19.2275[published Online First: Epub Date]].

12. Singh JA, Wells GA, Christensen R, et al. Adverse effects of biologics: a network meta-analysis and Cochrane overview. *Cochrane database of systematic reviews* 2011(2):CD008794 doi: 10.1002/14651858.CD008794.pub2[published Online First: Epub Date]].
13. Psoriasis: the assessment and management of psoriasis. National Institute for Health and Clinical Excellence - Clinical Guidelines 2012
14. Guidelines of care for the management of psoriasis and psoriatic arthritis. Section 1. Overview of psoriasis and guidelines of care for the treatment of psoriasis with biologics. . American Academy of Dermatology 2008
15. Papp K, Gulliver W, Lynde C, et al. Canadian guidelines for the management of plaque psoriasis: overview. *Journal of cutaneous medicine and surgery* 2011;**15**(4):210-9
16. Pathirana D, Ormerod AD, Saiag P, et al. European S3-guidelines on the systemic treatment of psoriasis vulgaris. *Journal of the European Academy of Dermatology and Venereology* : JEADV 2009;**23 Suppl 2**:1-70 doi: 10.1111/j.1468-3083.2009.03389.x[published Online First: Epub Date]].
17. GRUPO. IBOPE INTELIGÊNCIA. Coleta de dados. Diversos métodos para atender à sua demanda. Publicação em 28/04/2009. <http://www.ibope.com.br>. Acesso em 28 ju. 2011. 2011
18. LIPE. PESQUISAS. Dúvidas frequentes: o que é CATI ? Disponível em <http://www.lipe.com.br>. Acesso em 28 jul. 2011. 2011
19. Miller DW, Feldman SR. Cost-effectiveness of moderate-to-severe psoriasis treatment. *Expert opinion on pharmacotherapy* 2006;**7**(2):157-67 doi: 10.1517/14656566.7.2.157[published Online First: Epub Date]].
20. Pearce DJ, Thomas CG, Fleischer AB, Jr., et al. The cost of psoriasis therapies: considerations for therapy selection. *Dermatology nursing / Dermatology Nurses' Association* 2004;**16**(5):421-8, 32
21. Lucka TC, Pathirana D, Sammain A, et al. Efficacy of systemic therapies for moderate-to-severe psoriasis: a systematic review and meta-analysis of long-term treatment. *Journal of the European Academy of Dermatology and Venereology* 2012;**26**(11):1331-44 doi: 10.1111/j.1468-3083.2012.04492.x[published Online First: Epub Date]].
22. Schmitt J, Zhang Z, Wozel G, et al. Efficacy and tolerability of biologic and nonbiologic systemic treatments for moderate-to-severe psoriasis: meta-analysis of randomized controlled trials. *The British journal of dermatology* 2008;**159**(3):513-26 doi: 10.1111/j.1365-2133.2008.08732.x[published Online First: Epub Date]].
23. Naldi L, Rznay B. Psoriasis (chronic plaque). *Clinical evidence* 2009;**1706**(1):1-109
24. Vieira FS, Zucchi P. Distorções causadas pelas ações judiciais à política de medicamentos no Brasil. *Revista de Saúde Pública* 2007;**41**:214-22
25. Biehl J, Amon JJ, Socal MP, et al. Between the court and the clinic: lawsuits for medicines and the right to health in Brazil. *Health Hum Rights* 2012;**14**(1):E36-52
26. Chieffi AL, Barata RB. ['Judicialization' of public health policy for distribution of medicines]. *Cad Saude Publica* 2009;**25**(8):1839-49
27. Grimshaw JM, Eccles MP, Lavis JN, et al. Knowledge translation of research findings. *Implementation science* : IS 2012;**7**:50 doi: 10.1186/1748-5908-7-50[published Online First: Epub Date]].
28. Cabana MD, Rand CS, Powe NR, et al. Why don't physicians follow clinical practice guidelines? A framework for improvement. *JAMA* 1999;**282**(15):1458-65

1  
2  
3  
4  
5  
6  
7  
8  
9  
10  
11  
12  
13  
14  
15  
16  
17  
18  
19  
20  
21  
22  
23  
24  
25  
26  
27  
28  
29  
30  
31  
32  
33  
34  
35  
36  
37  
38  
39  
40  
41  
42  
43  
44  
45  
46  
47  
48  
49  
50  
51  
52  
53  
54  
55  
56  
57  
58  
59  
60

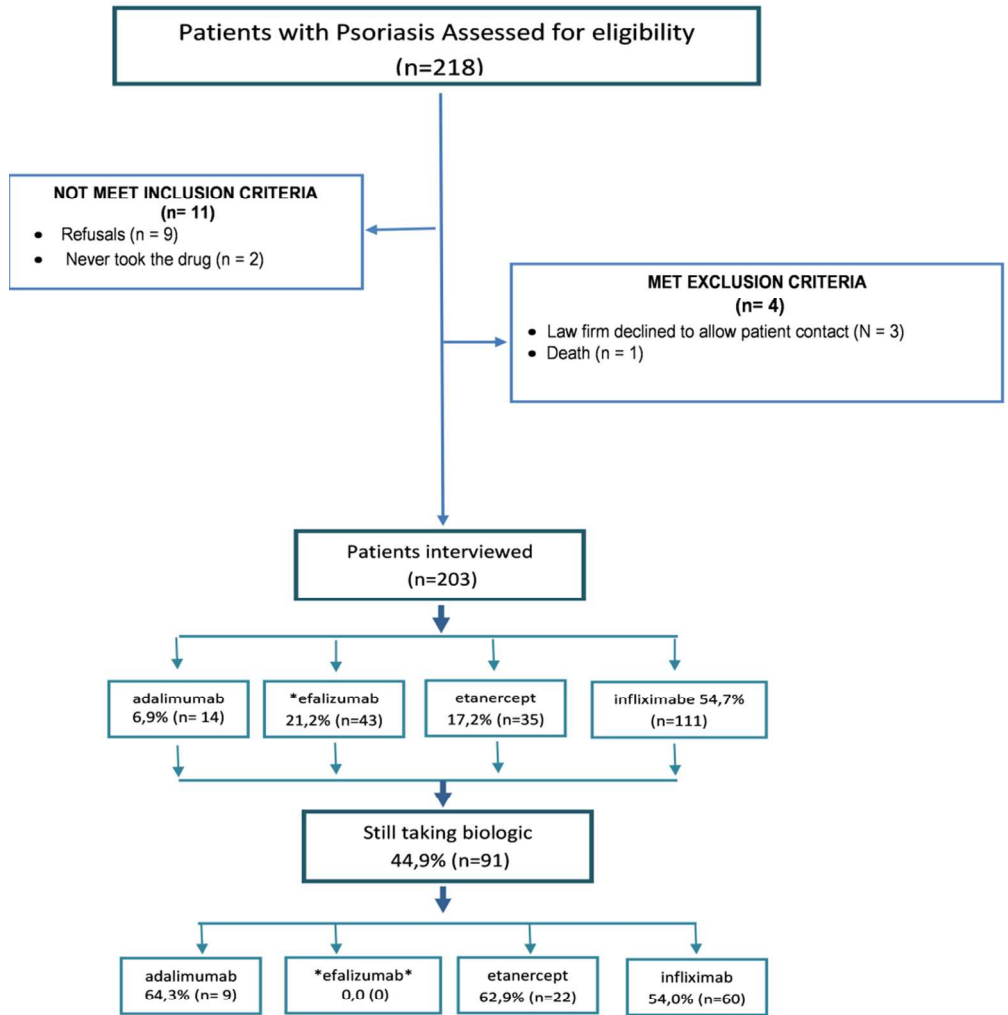

*\*Removed from the market in 2009;*

**Figure 1 - Flow diagram of the steps of the sample composition of plaintiff included in the study**

90x107mm (300 x 300 DPI)

STROBE 2007 (v4) Statement—Checklist of items that should be included in reports of *cross-sectional studies*

| Section/Topic                | Item # | Recommendation                                                                                                                                                                       | Reported on page # |
|------------------------------|--------|--------------------------------------------------------------------------------------------------------------------------------------------------------------------------------------|--------------------|
| Title and abstract           | 1      | (a) Indicate the study's design with a commonly used term in the title or the abstract                                                                                               | 2                  |
|                              |        | (b) Provide in the abstract an informative and balanced summary of what was done and what was found                                                                                  | 2                  |
| <b>Introduction</b>          |        |                                                                                                                                                                                      |                    |
| Background/rationale         | 2      | Explain the scientific background and rationale for the investigation being reported                                                                                                 | 4                  |
| Objectives                   | 3      | State specific objectives, including any prespecified hypotheses                                                                                                                     | 4                  |
| <b>Methods</b>               |        |                                                                                                                                                                                      |                    |
| Study design                 | 4      | Present key elements of study design early in the paper                                                                                                                              | 5                  |
| Setting                      | 5      | Describe the setting, locations, and relevant dates, including periods of recruitment, exposure, follow-up, and data collection                                                      | 5                  |
| Participants                 | 6      | (a) Give the eligibility criteria, and the sources and methods of selection of participants                                                                                          | 5                  |
| Variables                    | 7      | Clearly define all outcomes, exposures, predictors, potential confounders, and effect modifiers. Give diagnostic criteria, if applicable                                             | 6                  |
| Data sources/<br>measurement | 8*     | For each variable of interest, give sources of data and details of methods of assessment (measurement). Describe comparability of assessment methods if there is more than one group | 6                  |
| Bias                         | 9      | Describe any efforts to address potential sources of bias                                                                                                                            | 6                  |
| Study size                   | 10     | Explain how the study size was arrived at                                                                                                                                            | 5                  |
| Quantitative variables       | 11     | Explain how quantitative variables were handled in the analyses. If applicable, describe which groupings were chosen and why                                                         | 6                  |
| Statistical methods          | 12     | (a) Describe all statistical methods, including those used to control for confounding                                                                                                | 6                  |
|                              |        | (b) Describe any methods used to examine subgroups and interactions                                                                                                                  |                    |
|                              |        | (c) Explain how missing data were addressed                                                                                                                                          |                    |
|                              |        | (d) If applicable, describe analytical methods taking account of sampling strategy                                                                                                   |                    |
|                              |        | (e) Describe any sensitivity analyses                                                                                                                                                |                    |
| <b>Results</b>               |        |                                                                                                                                                                                      |                    |

|                          |     |                                                                                                                                                                                                                                                                                                                                                                                                               |                   |
|--------------------------|-----|---------------------------------------------------------------------------------------------------------------------------------------------------------------------------------------------------------------------------------------------------------------------------------------------------------------------------------------------------------------------------------------------------------------|-------------------|
| Participants             | 13* | (a) Report numbers of individuals at each stage of study—eg numbers potentially eligible, examined for eligibility, confirmed eligible, included in the study, completing follow-up, and analysed<br>(b) Give reasons for non-participation at each stage<br>(c) Consider use of a flow diagram                                                                                                               | 7<br><br>FIGURE 1 |
| Descriptive data         | 14* | (a) Give characteristics of study participants (eg demographic, clinical, social) and information on exposures and potential confounders<br>(b) Indicate number of participants with missing data for each variable of interest                                                                                                                                                                               | TABLE 1, PAGE 8   |
| Outcome data             | 15* | Report numbers of outcome events or summary measures                                                                                                                                                                                                                                                                                                                                                          | 9, 10             |
| Main results             | 16  | (a) Give unadjusted estimates and, if applicable, confounder-adjusted estimates and their precision (eg, 95% confidence interval). Make clear which confounders were adjusted for and why they were included<br>(b) Report category boundaries when continuous variables were categorized<br>(c) If relevant, consider translating estimates of relative risk into absolute risk for a meaningful time period | 9, 10             |
| Other analyses           | 17  | Report other analyses done—eg analyses of subgroups and interactions, and sensitivity analyses                                                                                                                                                                                                                                                                                                                | 9, 10             |
| <b>Discussion</b>        |     |                                                                                                                                                                                                                                                                                                                                                                                                               |                   |
| Key results              | 18  | Summarise key results with reference to study objectives                                                                                                                                                                                                                                                                                                                                                      | 10                |
| Limitations              | 19  | Discuss limitations of the study, taking into account sources of potential bias or imprecision. Discuss both direction and magnitude of any potential bias                                                                                                                                                                                                                                                    | 11                |
| Interpretation           | 20  | Give a cautious overall interpretation of results considering objectives, limitations, multiplicity of analyses, results from similar studies, and other relevant evidence                                                                                                                                                                                                                                    | 11                |
| Generalisability         | 21  | Discuss the generalisability (external validity) of the study results                                                                                                                                                                                                                                                                                                                                         | 12, 13            |
| <b>Other information</b> |     |                                                                                                                                                                                                                                                                                                                                                                                                               |                   |
| Funding                  | 22  | Give the source of funding and the role of the funders for the present study and, if applicable, for the original study on which the present article is based                                                                                                                                                                                                                                                 | 14                |

\*Give information separately for cases and controls in case-control studies and, if applicable, for exposed and unexposed groups in cohort and cross-sectional studies.

**Note:** An Explanation and Elaboration article discusses each checklist item and gives methodological background and published examples of transparent reporting. The STROBE checklist is best used in conjunction with this article (freely available on the Web sites of PLoS Medicine at <http://www.plosmedicine.org/>, Annals of Internal Medicine at <http://www.annals.org/>, and Epidemiology at <http://www.epidem.com/>). Information on the STROBE Initiative is available at [www.strobe-statement.org](http://www.strobe-statement.org).
